# Supplementary material for: Btk-specific inhibition blocks pathogenic plasma cell signatures and myeloid cell–associated damage in IFNα-driven lupus nephritis
Source: JCI journal article supplement (doi:10.1172/jci.insight.90111), 2017-04-06
Supplement: sd2 [file 2]

# Supplemental Table 3: Genes utilized for the Glomerulus gene set as detailed in the methods.

SUPPLEMENTAL TABLE 3

| probeset | ID  | symbol  | desc                                                                                   | Tubule.logFC | Tubule.adjP | Glomerulus.logFC | Glomerulus.adjP | probeset.1 | ID.1    | symbol.1                                      | desc.1                                                                | Nephritis.logFC | Nephritis.adjP |
|----------|-----|---------|----------------------------------------------------------------------------------------|--------------|-------------|------------------|-----------------|------------|---------|-----------------------------------------------|-----------------------------------------------------------------------|-----------------|----------------|
| 218896_a | ### | FAM57A  | family with sequence similarity 57, member A                                           | 0.102564724  | 0.19444731  | 0.420567453      | 1.63E-05        | 1435076_a  | ###     | Fam57a                                        | family with sequence similarity 57, member A                          | 0.38859731      | 0.01596059     |
| 219694_a | ### | FAM105  | family with sequence similarity 105, member A                                          | 0.011017424  | 0.87341589  | 0.00032168       | 1435375_a       | ###        | Fam105a | family with sequence similarity 105, member A | 0.84738588                                                            | 0.000126103     |                |
| 220252_x | ### | Cxor2f1 | chromosome X open reading frame 21                                                     | 0.093280155  | 0.1839243   | 0.512226065      | 2.58E-05        | 1430373_a  | ###     | 54304270                                      | RIKEN cDNA 5430427019 gene                                            | 0.749628535     | 0.002001139    |
| 213513_x | ### | ARPC2   | actin related protein 2/3 complex, subunit 2, 34kDa                                    | 0.302177861  | 0.00974793  | 0.653200461      | 1.72E-06        | 1442295_a  | ###     | Arpc2                                         | actin related protein 2/3 complex, subunit 2                          | 0.621210304     | 0.000229161    |
| 203887_x | ### | THBD    | thrombomodulin                                                                         | -0.2741124   | 0.07476412  | 1.172157779      | 5.97E-05        | 1448529_a  | ###     | Thbd                                          | thrombomodulin                                                        | 0.349471339     | 0.045483127    |
| 201990_x | ### | ST6GAL1 | beta-galactosidase alpha-2,6-sialyltransferase 1                                       | 0.428753424  | 0.05481425  | 0.626080208      | 0.000361842     | 1420928_a  | ###     | St6gal1                                       | beta-galactosidase alpha 2,6 sialyltransferase 1                      | 0.651663741     | 0.000347707    |
| 207691_x | ### | ENTPD1  | ectonucleoside triphosphate diphosphohydrolase 1                                       | 0.251474339  | 0.04421398  | 1.17436783       | 6.76E-06        | 1453586_a  | ###     | Entpd1                                        | ectonucleoside triphosphate diphosphohydrolase 1                      | 0.549419259     | 0.000887125    |
| 219424_a | ### | EBI3    | Epstein-Barr virus induced 3                                                           | -0.04336683  | 0.60388542  | 0.804415022      | 0.00142124      | 1449222_a  | ###     | Ebi3                                          | Epstein-Barr virus induced gene 3                                     | 0.544936966     | 0.000760589    |
| 210054_x | ### | HAUS3   | HAUS augmin-like complex, subunit 3                                                    | 0.198653772  | 0.01054609  | 0.451380819      | 0.000174233     | 1423919_a  | ###     | Haus3                                         | HAUS augmin-like complex, subunit 3                                   | 0.480513068     | 0.003227212    |
| 204192_x | ### | CD37    | CD37 molecule                                                                          | 0.138705503  | 0.30085287  | 0.531363562      | 0.013908349     | 1425736_a  | ###     | Cd37                                          | CD37 antigen                                                          | 0.384046832     | 0.00176252     |
| 209679_x | ### | SELPLG  | selectin P ligand                                                                      | 0.269167485  | 0.03730658  | 0.663517241      | 0.015827349     | 1449127_a  | ###     | Selpig                                        | selectin, platelet (p-selectin) ligand                                | 0.663652171     | 0.00332126     |
| 218308_x | ### | TACC3   | transforming, acidic coiled-coil containing protein 3                                  | 0.132627784  | 0.15058342  | 0.828618251      | 4.59E-06        | 1417450_a  | ###     | Tacc3                                         | transforming, acidic coiled-coil containing protein 3                 | 0.341806952     | 0.003688026    |
| 48531_a  | ### | TNIP2   | TNFAIP3 interacting protein 2                                                          | -0.27998821  | 0.01025279  | 0.476132785      | 2.40E-06        | 1419488_a  | ###     | Tnip2                                         | TNFAIP3 interacting protein 2                                         | 0.395254593     | 0.005797345    |
| 203761_x | ### | SLA     | Src-like adaptor                                                                       | 0.26686641   | 0.17854395  | 1.360113056      | 9.11E-09        | 1420819_a  | ###     | Sla                                           | src-like adaptor                                                      | 1.452685647     | 8.74E-07       |
| 205786_x | ### | ITGAM   | integrin, alpha M (complement component 3 receptor 3 subunit)                          | 0.186997827  | 0.14608023  | 1.455303219      | 7.64E-05        | 1422046_a  | ###     | Itgam                                         | integrin alpha M                                                      | 1.355115898     | 0.000324451    |
| 206687_x | ### | PTPN6   | protein tyrosine phosphatase, non-receptor type 6                                      | 0.051360864  | 0.4501086   | 0.791546936      | 0.001194041     | 1460188_a  | ###     | Ptpn6                                         | protein tyrosine phosphatase, non-receptor type 6                     | 0.710365977     | 0.00184022     |
| 218802_x | ### | CCDC109 | coiled-coil domain containing 109B                                                     | 0.17876133   | 0.11377797  | 0.530574504      | 0.022887484     | 1418778_a  | ###     | Ccdc109b                                      | coiled-coil domain containing 109B                                    | 0.718922817     | 0.000997026    |
| 219279_x | ### | DOCK10  | dedicator of cytokinesis 10                                                            | 0.119256004  | 0.10473414  | 1.033877694      | 0.000562775     | 1435343_a  | ###     | Dock10                                        | dedicator of cytokinesis 10                                           | 1.106147216     | 1.03E-05       |
| 203471_x | ### | PLEK    | pleckstrin                                                                             | 0.252592942  | 0.11468498  | 2.155507161      | 4.24E-07        | 1448749_a  | ###     | Plek                                          | pleckstrin                                                            | 1.711062593     | 3.12E-05       |
| 202332_x | ### | CSNK1E  | casein kinase 1, epsilon                                                               | -0.03696768  | 0.1736304   | 0.339101951      | 0.030159741     | 1417176_a  | ###     | Csnk1e                                        | casein kinase 1, epsilon                                              | 0.427329758     | 0.030611416    |
| 202007_x | ### | NID1    | nidogen 1                                                                              | 0.268652136  | 0.08507559  | 0.88881518       | 0.000848744     | 1416808_a  | ###     | Nid1                                          | nidogen 1                                                             | 0.461437245     | 0.006390542    |
| 205061_x | ### | CRIPI1  | cysteine-rich protein 1 (intestinal)                                                   | 0.317558871  | 0.06040556  | 1.33726819       | 2.13E-06        | 1416326_a  | ###     | Crip1                                         | cysteine-rich protein 1 (intestinal)                                  | 0.861824431     | 0.000271776    |
| 212481_x | ### | TPM4    | tropomyosin 4                                                                          | 0.237253104  | 0.10233242  | 0.657749692      | 0.000947873     | 1433883_a  | ###     | Tpm4                                          | tropomyosin 4                                                         | 0.691582156     | 0.000256773    |
| 218322_x | ### | ACSL5   | acyl-CoA synthetase long-chain family member 5                                         | 0.225215768  | 0.01765454  | 0.471391091      | 0.012543014     | 1428002_a  | ###     | Acsf5                                         | acyl-CoA synthetase long-chain family member 5                        | 0.395078063     | 0.007991978    |
| 219093_x | ### | PID1    | phosphotyrosine interaction domain containing 1                                        | 0.107570299  | 0.29152471  | 0.62761547       | 0.00716484      | 1436999_a  | ###     | Pid1                                          | phosphotyrosine interaction domain containing 1                       | 0.396144949     | 0.046119858    |
| 218130_x | ### | C17orf6 | chromosome 17 open reading frame 62                                                    | 0.273075891  | 0.00033157  | 0.377678003      | 0.01180559      | 1423678_a  | ###     | BC017643                                      | cDNA sequence BC017643                                                | 0.424631148     | 0.00090711     |
| 219183_x | ### | CYTH4   | cytohesin 4                                                                            | 0.016335471  | 0.87324411  | 0.992235665      | 3.54E-06        | 1460437_a  | ###     | Cyth4                                         | cytohesin 4                                                           | 1.475774318     | 1.14E-05       |
| 204146_x | ### | RAD51A  | RAD51 associated protein 1                                                             | 0.10494545   | 0.03236858  | 0.503798965      | 0.001728793     | 1417938_a  | ###     | Rad51ap1                                      | RAD51 associated protein 1                                            | 0.32226247      | 0.027876783    |
| 215925_x | ### | CD72    | CD72 molecule                                                                          | -0.06234882  | 0.45211887  | 0.392346102      | 0.030707337     | 1426112_a  | ###     | Cd72                                          | CD72 antigen                                                          | 0.2050697506    | 2.16E-05       |
| 207677_x | ### | NCF4    | neutrophil cytosolic factor 4, 40kDa                                                   | 0.122076555  | 0.16004132  | 1.088868875      | 0.00027779      | 1418465_a  | ###     | Ncf4                                          | neutrophil cytosolic factor 4                                         | 1.232932638     | 2.44E-05       |
| 202705_x | ### | CNNB2   | cyclin B2                                                                              | 0.175953479  | 0.08571261  | 0.354607726      | 0.016348438     | 1450920_a  | ###     | Cnnb2                                         | cyclin B2                                                             | 0.946114304     | 0.001910659    |
| 203665_x | ### | HMOX1   | heme oxygenase (decycling) 1                                                           | 0.050495928  | 0.85849582  | 1.030010111      | 0.001265494     | 1448239_a  | ###     | Hmox1                                         | heme oxygenase (decycling) 1                                          | 1.135670754     | 0.015179598    |
| 201069_x | ### | MMMP2   | matrix metalloproteinase 2 (gelatinase A, 72kDa gelatinase, 72kDa type IV collagenase) | 0.119237929  | 0.19161641  | 0.42875495       | 0.003597149     | 1439364_a  | ###     | Mmp2                                          | matrix metalloproteinase 2                                            | 0.8255959       | 0.000177554    |
| 203438_x | ### | STC2    | stanniocalcin 2                                                                        | -0.21198235  | 0.10065119  | 0.401052225      | 0.041406825     | 1449484_a  | ###     | Stc2                                          | stanniocalcin 2                                                       | 0.409101844     | 0.033821554    |
| 206219_x | ### | WAV1    | vav 1 guanine nucleotide exchange factor                                               | -0.01366766  | 0.85936251  | 0.741908405      | 0.002147137     | 1422932_a  | ###     | Vav1                                          | vav 1 oncogene                                                        | 0.607072573     | 0.003927289    |
| 213160_x | ### | DOCK2   | dedicator of cytokinesis 2                                                             | 0.279409732  | 0.02832002  | 1.610113847      | 1.96E-06        | 1422808_a  | ###     | Dock2                                         | dedicator of cyto-kinesis 2                                           | 0.547213033     | 0.014976607    |
| 205270_x | ### | LCP2    | lymphocyte cytosolic protein 2 (SH2 domain containing leukocyte protein of 76kDa)      | 0.248057373  | 0.06497382  | 1.177693574      | 8.34E-06        | 1418641_a  | ###     | Lcp2                                          | lymphocyte cytosolic protein 2                                        | 1.45990877      | 0.000132212    |
| 205297_x | ### | CD79B   | CD79b molecule, immunoglobulin-associated beta                                         | -0.03453252  | 0.68100184  | 0.511702556      | 0.013058047     | 1417640_a  | ###     | Cd79b                                         | CD79b antigen                                                         | 1.274047486     | 0.003717289    |
| 213733_x | ### | MYO1F   | myosin IF                                                                              | 0.054691486  | 0.46591204  | 0.618836353      | 0.00973021      | 1429525_a  | ###     | Myo1f                                         | myosin IF                                                             | 0.678286667     | 0.006235383    |
| 204639_x | ### | ADA     | adenosine deaminase                                                                    | 0.118318113  | 0.25769994  | 1.118236633      | 3.54E-06        | 1417976_a  | ###     | Ada                                           | adenosine deaminase                                                   | 0.70508672      | 0.000792461    |
| 203175_x | ### | RHOG    | ras homolog family member G                                                            | -0.06573733  | 0.41920762  | 0.646862967      | 1.91E-06        | 1422572_a  | ###     | Rhog                                          | ras homolog gene family, member G                                     | 0.399605233     | 0.002222291    |
| 202910_x | ### | CD97    | CD97 molecule                                                                          | 0.118471121  | 0.22499789  | 1.026827057      | 0.00161832      | 1418394_a  | ###     | Cd97                                          | CD97 antigen                                                          | 0.474773441     | 3.64E-05       |
| 206991_x | ### | CCR5    | chemokine (C-C motif) receptor 5 (gene/pseudogene)                                     | 0.066437918  | 0.41403574  | 0.738000141      | 0.002156572     | 1424727_a  | ###     | Ccr5                                          | chemokine (C-C motif) receptor 5                                      | 2.003807398     | 1.73E-05       |
| 204033_x | ### | TRIP13  | thyroid hormone receptor interactor 13                                                 | 0.043935796  | 0.56642292  | 0.341165308      | 0.008273331     | 1429295_a  | ###     | Trip13                                        | thyroid hormone receptor interactor 13                                | 0.534129165     | 0.00410806     |
| 203332_x | ### | INPP5D  | inositol polyphosphate-5-phosphatase, 145kDa                                           | 0.039989331  | 0.65286476  | 0.683176769      | 6.86E-05        | 1418110_a  | ###     | Inpp5d                                        | inositol polyphosphate-5-phosphatase D                                | 0.667369087     | 1.09E-06       |
| 207165_x | ### | HMMR    | hyaluronan-mediated motility receptor (RHAMM)                                          | 0.250765934  | 0.00680923  | 0.485658162      | 0.001781561     | 1450156_a  | ###     | Hmmr                                          | hyaluronan mediated motility receptor (RHAMM)                         | 0.552901175     | 0.008586589    |
| 203388_x | ### | ARRB2   | arrestin, beta 2                                                                       | -0.06390262  | 0.32518797  | 0.422592047      | 0.000347133     | 1451987_a  | ###     | Arrb2                                         | arrestin, beta 2                                                      | 1.037488353     | 4.51E-06       |
| 218181_x | ### | MAP4K4  | mitogen-activated protein kinase kinase kinase kinase 4                                | 0.254280179  | 0.00820393  | 0.78436937       | 0.00014556      | 1422615_a  | ###     | Map4k4                                        | mitogen-activated protein kinase kinase kinase kinase 4               | 0.646179246     | 0.00053637     |
| 222162_x | ### | ADAMTS  | ADAM metalloproteinase with thrombospondin type 1 motif, 1                             | 0.342613437  | 0.34479389  | 1.039574725      | 0.003843651     | 1450716_a  | ###     | Adamts1                                       | a disintegrin-like and metalloproteinase (repolyrin type) with thromb | 1.291288185     | 0.000949261    |
| 203554_x | ### | PTTG1   | pituitary tumor-transforming 1                                                         | 0.290056886  | 0.05462328  | 0.786256203      | 0.000585825     | 1424105_a  | ###     | Pttg1                                         | pituitary tumor-transforming gene 1                                   | 0.484766828     | 0.022542051    |
| 206618_x | ### | IL18R1  | interleukin 18 receptor 1                                                              | 0.04168557   | 0.60388542  | 0.575844524      | 0.014313402     | 1421628_a  | ###     | Il18r1                                        | interleukin 18 receptor 1                                             | 0.503146843     | 0.001613706    |
| 202370_x | ### | CBFB    | core-binding factor, beta subunit                                                      | 0.221810466  | 0.13606485  | 0.586915155      | 0.000196609     | 1460716_a  | ###     | Cbfb                                          | core binding factor beta                                              | 0.524184525     | 3.67E-05       |
| 202948_x | ### | IL1R1   | interleukin 1 receptor, type I                                                         | 0.154848491  | 0.42447124  | 0.509037127      | 0.005472433     | 1448950_a  | ###     | Il1r1                                         | interleukin 1 receptor, type I                                        | 0.4218885       | 0.033436078    |
| 215346_x | ### | CD40    | CD40 molecule, TNF receptor superfamily member 5                                       | 0.217654399  | 0.01256355  | 0.683920472      | 0.000167334     | 1439221_a  | ###     | Cd40                                          | CD40 antigen                                                          | 0.586218159     | 0.003127769    |
| 203741_x | ### | ADCY7   | adenylate cyclase 7                                                                    | 0.143952295  | 0.10863525  | 1.126146968      | 2.85E-06        | 1456307_a  | ###     | Adcy7                                         | adenylate cyclase 7                                                   | 1.629097061     | 1.10E-05       |
| 219582_x | ### | OGFR1   | opioid growth factor receptor-like 1                                                   | 0.131281595  | 0.02283378  | 0.32709835       | 0.008940108     | 1424413_a  | ###     | Ogfr1                                         | opioid growth factor receptor-like 1                                  | 0.480797042     | 0.010220971    |
| 213988_x | ### | SAT1    | spermidine/spermine N1-acetyltransferase 1                                             | 0.000630518  | 0.99648847  | 0.490750161      | 0.030961264     | 1420502_a  | ###     | Sat1                                          | spermidine/spermine N1-acetyl transferase 1                           | 0.734615165     | 0.001966373    |
| 202207_x | ### | ARL4C   | ADP-ribosylation factor-like 4C                                                        | 0.515627701  | 0.11513433  | 0.8367659        | 0.013170737     | 1454788_a  | ###     | Arl4c                                         | ADP-ribosylation factor-like 4C                                       | 0.691699136     | 0.000239649    |
| 207808_x | ### | PROS1   | protein S (alpha)                                                                      | 0.257890906  | 0.02891374  | 0.636967916      | 2.67E-05        | 1426246_a  | ###     | Pros1                                         | protein S (alpha)                                                     | 0.6398322       | 9.74E-06       |
| 221840_x | ### | PTPRE   | protein tyrosine phosphatase, receptor type, E                                         | 0.262510085  | 0.07846565  | 1.360582097      | 2.00E-05        | 1418540_a  | ###     | Ptpre                                         |                                                                       |                 |                |

|            |          |                                                                                       |              |            |             |             |             |           |                                                                          |             |             |
|------------|----------|---------------------------------------------------------------------------------------|--------------|------------|-------------|-------------|-------------|-----------|--------------------------------------------------------------------------|-------------|-------------|
| 202870_s_# | CDC20    | cell division cycle 20 homolog (S. cerevisiae)                                        | 0.039271999  | 0.77813765 | 0.507263987 | 0.014964356 | 1439377_x_# | Cdc20     | cell division cycle 20 homolog (S. cerevisiae)                           | 1.433028259 | 9.20E-05    |
| 218109_s_# | NANS     | N-acetylneuraminic acid synthase                                                      | -0.08407433  | 0.37251876 | 0.408115851 | 0.02120671  | 1417773_at  | Nans      | N-acetylneuraminic acid synthase (sialic acid synthase)                  | 0.342908232 | 0.009801395 |
| 204135_s_# | FILIP1L  | filamin A interacting protein 1-like                                                  | -0.3260946   | 0.15259599 | 0.681197119 | 0.007821533 | 1428861_at  | Filip1l   | filamin A interacting protein 1-like                                     | 0.702246469 | 0.000422576 |
| 220146_s_# | TLR7     | tol-like receptor 7                                                                   | 0.249982214  | 0.00188967 | 0.511311998 | 0.0008257   | 1422010_at  | Tr7       | tol-like receptor 7                                                      | 0.552423448 | 0.009422975 |
| 204769_s_# | TAP2     | transporter 2, ATP-binding cassette, sub-family B (MDR/TAP)                           | 0.307022294  | 0.03014294 | 0.900648747 | 3.13E-05    | 1453913_a_# | Tap2      | transporter 2, ATP-binding cassette, sub-family B (MDR/TAP)              | 0.716647372 | 0.00030354  |
| 201189_s_# | ITPR3    | inositol 1,4,5-trisphosphate receptor, type 3                                         | 0.122047947  | 0.29298059 | 0.410215926 | 0.042203281 | 1417297_at  | Itpr3     | inositol 1,4,5-trisphosphate receptor 3                                  | 0.417875334 | 0.010605132 |
| 220307_s_# | CD244    | CD244 molecule, natural killer cell receptor 2B4                                      | -0.20163588  | 0.01368023 | 0.351301517 | 0.004101577 | 1449991_at  | Cd244     | CD244 natural killer cell receptor 2B4                                   | 0.521981483 | 0.006204091 |
| 209325_s_# | RG516    | regulator of G-protein signaling 16                                                   | -0.22125197  | 0.00679999 | 0.346461763 | 0.042566966 | 1426037_x_# | Rgs16     | regulator of G-protein signaling 16                                      | 0.727368675 | 0.00422558  |
| 221060_s_# | TLR4     | tol-like receptor 4                                                                   | 0.123421588  | 0.14072465 | 0.492671488 | 0.000136478 | 1418162_at  | Tr4       | tol-like receptor 4                                                      | 0.853477323 | 2.92E-05    |
| 206214_s_# | PLA2G7   | phospholipase A2, group VII (platelet-activating factor acetylhydrolase, plasma)      | 0.22564236   | 0.06877421 | 1.47571026  | 0.00029547  | 1430700_x_# | Pla2g7    | phospholipase A2, group VII (platelet-activating factor acetylhydrolase) | 0.828127026 | 0.000427473 |
| 212873_s_# | HMHA1    | histocompatibility (minor) HA-1                                                       | 0.248973525  | 0.05774405 | 0.891852394 | 0.001586382 | 1428242_at  | Hmha1     | histocompatibility (minor) HA-1                                          | 0.638947777 | 0.001050409 |
| 204236_s_# | FU1      | Friend leukemia virus integration 1                                                   | 0.240420795  | 0.00967859 | 1.51268754  | 6.08E-06    | 1433512_at  | Fil1      | Friend leukemia virus integration 1                                      | 0.733624107 | 0.018412196 |
| 211013_s_# | PML      | promyelocytic leukemia                                                                | 0.185212931  | 0.0083708  | 0.391047138 | 0.00552642  | 1459137_at  | Pml       | promyelocytic leukemia                                                   | 0.458773086 | 0.002012039 |
| 216834_s_# | RG51     | regulator of G-protein signaling 1                                                    | -0.15859275  | 0.59831732 | 1.117231114 | 0.020317543 | 1417601_at  | Rgs1      | regulator of G-protein signaling 1                                       | 0.954688314 | 0.000271764 |
| 208912_s_# | CNP      | 2',3'-cyclic nucleotide 3' phosphodiesterase                                          | 0.303354001  | 0.00078468 | 0.483685406 | 2.43E-06    | 1437341_x_# | Cnp       | 2',3'-cyclic nucleotide 3' phosphodiesterase                             | 1.094877344 | 6.78E-06    |
| 212543_s_# | AIM1     | absent in melanoma 1                                                                  | 0.205817306  | 0.08965433 | 0.991477856 | 3.60E-05    | 1426942_at  | Aim1      | absent in melanoma 1                                                     | 0.353588134 | 0.003568359 |
| 212657_s_# | IL1RN    | interleukin 1 receptor antagonist                                                     | -0.00557427  | 0.95710213 | 2.120109537 | 0.000440965 | 1451798_at  | Il1rn     | interleukin 1 receptor antagonist                                        | 0.811591688 | 0.002406235 |
| 204748_s_# | PTGS2    | prostaglandin-endoperoxide synthase 2 (prostaglandin G/H synthase and cyclooxygenase) | -0.01303609  | 0.89208111 | 0.700454958 | 0.016888861 | 1417262_at  | Ptgs2     | prostaglandin-endoperoxide synthase 2                                    | 0.515212178 | 0.001380135 |
| 204336_s_# | RG519    | regulator of G-protein signaling 19                                                   | 0.127281311  | 0.08874589 | 0.994271832 | 1.27E-06    | 1438490_x_# | Rgs19     | regulator of G-protein signaling 19                                      | 0.99156693  | 0.000584195 |
| 218611_s_# | IER5     | immediate early response 5                                                            | 0.232556082  | 0.21437802 | 0.913305712 | 0.004506217 | 1417612_at  | Ier5      | immediate early response 5                                               | 0.589648046 | 0.000418369 |
| 206380_s_# | CFP      | complement factor properdin                                                           | -0.07626529  | 0.38086099 | 0.921772002 | 4.42E-05    | 1452279_at  | Cfp       | complement factor properdin                                              | 1.03888113  | 5.85E-05    |
| 209734_s_# | NCKAP1   | NCK-associated protein 1-like                                                         | 0.088448469  | 0.08960179 | 0.898060985 | 6.43E-06    | 1428787_at  | Nckap1l   | NCK associated protein 1 like                                            | 0.829109322 | 1.88E-05    |
| 219282_s_# | TRPV2    | transient receptor potential cation channel, subfamily V, member 2                    | -0.07839322  | 0.92773648 | 1.333085283 | 1.36E-06    | 1416935_at  | Trpv2     | transient receptor potential cation channel, subfamily V, member 2       | 0.491990284 | 0.001710332 |
| 206118_s_# | STAT4    | signal transducer and activator of transcription 4                                    | -0.06074656  | 0.49556944 | 0.459237295 | 0.040957267 | 1448713_at  | Stat4     | signal transducer and activator of transcription 4                       | 0.400772545 | 0.039442522 |
| 210845_s_# | PLAUR    | plasminogen activator, urokinase receptor                                             | -0.35509459  | 0.00444033 | 0.668658835 | 0.02281778  | 1452521_a_# | Plaur     | plasminogen activator, urokinase receptor                                | 0.631772351 | 0.003144623 |
| 221521_s_# | GINS2    | GINS complex subunit 2 (Psf2 homolog)                                                 | 0.161815469  | 0.02466051 | 0.332278156 | 0.006684647 | 1452881_at  | Gins2     | GINS complex subunit 2 (Psf2 homolog)                                    | 0.474538155 | 0.012191773 |
| 219403_s_# | HPSE     | heparanase                                                                            | 0.1682417    | 0.07248248 | 1.184021641 | 5.90E-05    | 1433930_at  | Hpse      | heparanase                                                               | 0.449165322 | 0.00138611  |
| 218009_s_# | PRC1     | protein regulator of cytokinesis 1                                                    | 0.203657416  | 0.05379066 | 0.682839655 | 0.017910799 | 1423774_x_# | Prc1      | protein regulator of cytokinesis 1                                       | 0.563654311 | 0.002247013 |
| 213915_s_# | NGK7     | natural killer cell group 7 sequence                                                  | 0.228762414  | 0.08925922 | 0.880193627 | 0.001101606 | 1450753_at  | Nkg7      | natural killer cell group 7 sequence                                     | 0.881068076 | 0.009963508 |
| 205119_s_# | FPR1     | formyl peptide receptor 1                                                             | 0.10036542   | 0.50369138 | 0.946592084 | 0.004977368 | 1450808_at  | Fpr1      | formyl peptide receptor 1                                                | 1.081103038 | 0.00103902  |
| 213888_s_# | TRAF3IP  | TRAF3 interacting protein 3                                                           | -0.01362446  | 0.91892591 | 1.216165265 | 0.000589751 | 1434573_at  | Traf3ip3  | TRAF3 interacting protein 3                                              | 0.460777901 | 0.006824458 |
| 203185_s_# | RASSF2   | Ras association (RalGDS/AF-6) domain family member 2                                  | 0.273096528  | 0.80702157 | 1.51950548  | 2.22E-06    | 1428392_at  | Rassf2    | Ras association (RalGDS/AF-6) domain family member 2                     | 0.599657723 | 0.005063773 |
| 214770_s_# | MSR1     | macrophage scavenger receptor 1                                                       | 0.351103794  | 0.00128339 | 1.11214601  | 0.000164223 | 1448061_at  | Msr1      | macrophage scavenger receptor 1                                          | 0.823129148 | 0.001960181 |
| 208438_s_# | FGR      | Gardner-Rasheed feline sarcoma viral (v-fgr) oncogene homolog                         | 0.036496779  | 0.88478813 | 1.510219728 | 1.28E-07    | 1442804_at  | Fgr       | Gardner-Rasheed feline sarcoma viral (Fgr) oncogene homolog              | 0.45140439  | 0.001159224 |
| 218039_s_# | NUSAP1   | nuclear and spindle associated protein 1                                              | 0.286164545  | 0.09850391 | 0.994954531 | 0.002831286 | 1416309_at  | Nusap1    | nuclear and spindle associated protein 1                                 | 0.962100775 | 0.002452505 |
| 209828_s_# | IL16     | interleukin 16                                                                        | 0.003402907  | 0.96698166 | 0.410872909 | 0.027592866 | 1417391_a_# | Il16      | interleukin 16                                                           | 0.689161092 | 6.91E-05    |
| 212680_x_# | PPP1R14  | protein phosphatase 1, regulatory (inhibitor) subunit 14B                             | 0.27339202   | 0.00825368 | 0.515984078 | 0.001905898 | 1450914_at  | Ppp1r14b  | protein phosphatase 1, regulatory (inhibitor) subunit 14B                | 0.508298437 | 0.000820303 |
| 204440_s_# | CD83     | CD83 molecule                                                                         | -0.61327038  | 0.00015688 | 0.560398091 | 0.035372284 | 1416111_at  | Cd83      | CD83 antigen                                                             | 1.059158198 | 0.000624375 |
| 219148_s_# | PBK      | PDZ binding kinase                                                                    | 0.255752876  | 0.04204952 | 0.387391463 | 0.013134185 | 1448627_s_# | Pbk       | PDZ binding kinase                                                       | 0.859642295 | 0.001201412 |
| 204197_s_# | RUNX3    | run-related transcription factor 3                                                    | 0.02708103   | 0.8120793  | 0.724955894 | 0.000578644 | 1440275_at  | Runx3     | run-related transcription factor 3                                       | 0.498785285 | 0.002149152 |
| 204924_s_# | TLR2     | tol-like receptor 2                                                                   | 0.284792374  | 0.0088033  | 1.729820613 | 6.15E-07    | 1419132_at  | Tr2       | tol-like receptor 2                                                      | 1.05236272  | 9.46E-06    |
| 202647_s_# | NRAS     | neuroblastoma RAS viral (v-ras) oncogene homolog                                      | 0.100150311  | 0.57196988 | 0.878901861 | 5.75E-06    | 1454060_a_# | Nras      | neuroblastoma ras oncogene                                               | 0.418781274 | 0.004506024 |
| 209685_s_# | PRKCB    | protein kinase C, beta4                                                               | 0.260104989  | 0.07544134 | 1.094275281 | 0.000285664 | 1460419_a_# | Prkcb     | protein kinase C, beta                                                   | 1.166332141 | 0.00206054  |
| 219033_s_# | PARP8    | poly (ADP-ribose) polymerase family, member 8                                         | 0.240671429  | 0.00822206 | 0.521533538 | 8.19E-05    | 1451474_x_# | Parp8     | poly (ADP-ribose) polymerase family, member 8                            | 0.497905281 | 0.003440458 |
| 203603_s_# | ZEB2     | zinc finger E-box binding homeobox 2                                                  | 0.123263599  | 0.19410248 | 0.716792438 | 0.003492085 | 1422748_at  | Zeb2      | zinc finger E-box binding homeobox 2                                     | 0.5649364   | 0.008203675 |
| 217755_s_# | HN1      | hematological and neurological expressed 1                                            | 0.359891048  | 0.05150999 | 0.681675286 | 3.01E-06    | 1416028_x_# | Hn1       | hematological and neurological expressed sequence 1                      | 0.83234572  | 0.00132043  |
| 216250_s_# | LPXN     | leupaxin                                                                              | 0.305273579  | 0.02653236 | 0.999302817 | 8.35E-05    | 1424965_at  | Lpxn      | leupaxin                                                                 | 1.337238746 | 8.59E-05    |
| 209124_s_# | MYD88    | myeloid differentiation primary response gene (88)                                    | 0.281170338  | 0.00271375 | 1.047671448 | 2.54E-08    | 1419272_at  | Myd88     | myeloid differentiation primary response gene 88                         | 0.498723043 | 0.000335319 |
| 213416_s_# | ITGA4    | integrin, alpha 4 (antigen CD49D, alpha 4 subunit of VLA-4 receptor)                  | 0.05629419   | 0.65712997 | 0.854442389 | 0.002256323 | 1456498_at  | Itga4     | integrin alpha 4                                                         | 1.06586079  | 2.52E-05    |
| 204882_s_# | ARHGAP   | Rho GTPase activating protein 25                                                      | 0.129559661  | 0.34868829 | 0.849212151 | 7.96E-06    | 1437072_at  | Arhgap25  | Rho GTPase activating protein 25                                         | 0.641591174 | 0.000347025 |
| 208885_s_# | LCP1     | lymphocyte cytosolic protein 1 (L-plastin)                                            | 0.150158104  | 0.28177774 | 1.766999228 | 6.70E-07    | 1415983_at  | Lcp1      | lymphocyte cytosolic protein 1                                           | 1.518996226 | 0.000107962 |
| 215136_s_# | EXOSC8   | exosome component 8                                                                   | 0.243196405  | 0.01791286 | 0.605590578 | 0.000588408 | 1428291_at  | Exosc8    | exosome component 8                                                      | 0.325232909 | 0.01621741  |
| 205418_s_# | FES      | feline sarcoma oncogene                                                               | -0.06165233  | 0.46590042 | 0.382159944 | 0.027575874 | 1452410_a_# | Fes       | feline sarcoma oncogene                                                  | 0.534252914 | 0.000608796 |
| 217986_s_# | BAZ1A    | bromodomain adjacent to zinc finger domain, 1A                                        | 0.203579767  | 0.17518085 | 1.016444709 | 1.43E-05    | 1433599_at  | Baz1a     | bromodomain adjacent to zinc finger domain 1A                            | 0.910936671 | 1.91E-05    |
| 204923_s_# | SASH3    | SAM and SH3 domain containing 3                                                       | -0.05265098  | 0.6195008  | 0.700182735 | 0.000349069 | 1427007_at  | Sash3     | SAM and SH3 domain containing 3                                          | 0.751738746 | 0.000577534 |
| 213226_s_# | CCNA2    | cyclin A2                                                                             | 0.084113172  | 0.25513059 | 0.417863928 | 0.0005294   | 1417911_at  | Cna2      | cyclin A2                                                                | 0.627908605 | 0.006374104 |
| 220068_s_# | CSAR1    | complement component 5a receptor 1                                                    | -0.00988933  | 0.86443999 | 0.853969896 | 0.003586353 | 1439902_at  | Csar1     | complement component 5a receptor 1                                       | 0.735041627 | 0.003803609 |
| 218223_s_# | PLEKHO   | pleckstrin homology domain containing, family O member 1                              | -0.001659189 | 0.02449495 | 0.383466517 | 0.049771222 | 1417128_at  | Plekho1   | pleckstrin homology domain containing, family O member 1                 | 0.885291158 | 8.76E-07    |
| 220005_s_# | P2RY13   | purinergic receptor P2Y, G-protein coupled, 13                                        | 0.156681889  | 0.11996962 | 0.839386828 | 0.000609599 | 1428700_at  | P2ry13    | purinergic receptor P2Y, G-protein coupled 13                            | 0.58049282  | 0.025849282 |
| 219593_s_# | SLC15A3  | solute carrier family 15, member 3                                                    | 0.153245487  | 0.12312022 | 1.156737096 | 5.10E-05    | 1420697_at  | Slc15a3   | solute carrier family 15, member 3                                       | 1.228332821 | 0.000201281 |
| 210815_s_# | CALCR    | calcitonin receptor-like                                                              | 0.257170487  | 0.00409793 | 0.631201669 | 0.003274092 | 1425814_a_# | Calcr     | calcitonin receptor-like                                                 | 0.454942453 | 0.032489035 |
| 210605_s_# | MFGE8    | milk fat globule-EGF factor 8 protein                                                 | -0.01957772  | 0.82693671 | 0.45319836  | 0.002754459 | 1420911_a_# | Mfge8     | milk fat globule-EGF factor 8 protein                                    | 0.352650951 | 0.020934846 |
| 203508_s_# | TNFRSF10 | tumor necrosis factor receptor superfamily, member 1B                                 | 0.039373564  | 0.68961067 | 1.52122275  | 1.15E-07    | 1418099_at  | Tnfrsf10b | tumor necrosis factor receptor superfamily, member 1b                    | 0.571055624 | 0.000565373 |
| 219892_s_# | TM6SF1   | transmembrane 6 superfamily member 1                                                  | 0.226795571  | 0.02887861 | 0.875818591 | 3.10E-05    | 1424443_at  | Tm6sf1    | transmembrane 6 superfamily member 1                                     | 1.199225879 | 0.001009526 |
| 209191_s_# | TUBB8    | tubulin, beta 6 class V                                                               | 0.109655202  | 0.68902964 | 0.445333015 | 0.009549474 | 1416431_at  | Tubb8     | tubulin, beta 6 class V                                                  | 0.626543331 | 0.007337516 |
| 202450_s_# | CTSK     | cathepsin K                                                                           | 0.146831193  | 0.32789923 | 0.836145218 | 8.21E-05    | 1450652_at  | Ctsk      | cathepsin K                                                              | 0.633396707 | 0.002023936 |
| 209282_s_# | PRKD2    | protein kinase D2                                                                     | 0.252780703  | 0.02481417 | 0.445671845 | 0.03132532  | 1434333_a_# | Prkd2     | protein kinase D2                                                        | 0.365732375 | 0.013559929 |
| 210279_s_# | GPR18    | G protein-coupled receptor 18                                                         | 0.158535178  | 0.24938973 | 0.703994126 | 0.030667341 | 1439141_at  | Gpr18     | G protein-coupled receptor 18                                            | 0.78421824  | 0.000404512 |
| 204285_s_# | PMAIP1   | phorbol-12-myristate-13-acetate-induced protein 1                                     | -0.36461398  | 0.02571222 | 0.431011007 | 0.044856954 | 1418203_at  | Pmaip1    | phorbol-12-myristate-13-acetate-induced protein 1                        | 1.037457222 | 0.004567641 |
| 208949_s_# | LGALS3   | lectin, galactoside-binding, soluble, 3                                               | -0.13761013  | 0.31670304 | 1.014656597 | 0.000148789 | 1426808_at  | Lgals3    | lectin, galactoside-binding, soluble 3                                   | 1.194915579 | 3.30E-05    |
| 219725_s_# | TREM2    | triggering receptor expressed on myeloid cells 2                                      | 0.12189923   | 0.25627393 | 0.881449984 | 0.002731603 | 1421792_s_# | Trem2     | triggering receptor expressed on myeloid cells 2                         | 0.359627264 | 0.003920952 |
| 203358_s_# | EZH2     | enhancer of zeste homolog 2 (Drosophila)                                              | 0.01083179   | 0.87043662 | 0.429004625 | 0.002467976 | 1416544_at  | Ezh2      | enhancer of zeste homolog 2 (Drosophila)                                 | 0.459290597 | 0.004742743 |
| 218084_x_# | FXD5     | FXD domain-containing ion transport regulator 5                                       | 0.2          |            |             |             |             |           |                                                                          |             |             |

**Supplemental Table 4: Genes utilized for the Tubulointerstitial gene set as detailed in the methods.**

SUPPLEMENTAL TABLE 4

| probeset    | ID     | symbol   | desc                                                        | Tubule.logFC | Tubule.adjP | Glomerulus.logFC | Glomerulus.adjP | probeset.1   | ID.1   | symbol.1      | desc.1                                                        | Nephritis.logFC | Nephritis.adjP |
|-------------|--------|----------|-------------------------------------------------------------|--------------|-------------|------------------|-----------------|--------------|--------|---------------|---------------------------------------------------------------|-----------------|----------------|
| 213694_at   | 54665  | R5BN1    | round spermatid basic protein 1                             | 0.362297148  | 0.006000997 | -0.821304706     | 0.004188718     | 1459981_s_at | 229675 | R5bn1         | rosbin, round spermatid basic protein 1                       | 0.438567892     | 0.031821072    |
| 201798_s_at | 26509  | MYOF     | myoferlin                                                   | 1.180045999  | 1.87E-05    | 0.300746658      | 0.167208397     | 1427318_s_at | 226101 | Myof          | myoferlin                                                     | 0.773189648     | 0.004279595    |
| 217791_s_at | 5832   | ALDH18A1 | aldehyde dehydrogenase 18 family, member A1                 | 0.414235269  | 0.000996605 | -0.268059599     | 0.053574591     | 1437325_x_at | 56454  | Alhd18a1      | aldehyde dehydrogenase 18 family, member A1                   | 1.081268945     | 9.63E-05       |
| 200670_at   | 7494   | XBP1     | X-box binding protein 1                                     | 0.361980088  | 0.022010383 | 0.047182603      | 0.764035817     | 1420886_a_at | 22433  | Xbp1          | X-box binding protein 1                                       | 0.389688        | 0.037775116    |
| 201020_at   | 7533   | YWHAH    | tyrosine 3-monooxygenase/tryptophan 5-monooxygenase         | 0.699157078  | 0.000412767 | 0.349176513      | 0.132025985     | 1416004_a_at | 22629  | Ywhah         | tyrosine 3-monooxygenase/tryptophan 5-monooxygenase acti      | 0.548938099     | 0.004816238    |
| 221610_s_at | 55620  | STAP2    | signal transducing adaptor family member 2                  | 0.355041146  | 0.005450294 | -0.121475208     | 0.604858889     | 1424148_a_at | 106766 | Stap2         | signal transducing adaptor family member 2                    | 0.692610493     | 0.01095811     |
| 212647_at   | 6237   | RRAS     | related RAS viral (r-ras) oncogene homolog                  | 0.647340832  | 0.000129697 | 0.047945368      | 0.773590696     | 1418448_at   | 20130  | Rras          | Harvey rat sarcoma oncogene, subgroup R                       | 0.64880005      | 0.000870866    |
| 207655_s_at | 29760  | BLNK     | B-cell linker                                               | 0.974911783  | 9.25E-07    | 0.344163722      | 0.315765005     | 1451780_at   | 17060  | Blnk          | B cell linker                                                 | 0.620367784     | 0.000546475    |
| 212190_at   | 5270   | SERPINE2 | serpin peptidase inhibitor, clade E (nexin, plasminogen ac  | 1.144499601  | 2.80E-05    | 0.537506319      | 0.16069973      | 1416666_at   | 20720  | Serpine2      | SERPE (or cysteine) peptidase inhibitor, clade E, member 2    | 0.873721627     | 0.000187086    |
| 204017_at   | 11015  | KDELH3   | KDEL (Lys-Asp-Glu-Leu) endoplasmic reticulum protein retenc | 0.660575664  | 0.000742945 | 0.220283978      | 0.460359524     | 1418538_at   | 105785 | Kdelr3        | KDEL (Lys-Asp-Glu-Leu) endoplasmic reticulum protein retentic | 0.33031651      | 0.029817172    |
| 205047_s_at | 440    | ASNS     | asparagine synthetase (glutamine-hydrolyzing)               | 0.55691299   | 0.00153684  | 0.271792167      | 0.059457739     | 1433966_x_at | 27053  | Asns          | asparagine synthetase                                         | 1.164069715     | 0.000157084    |
| 203868_s_at | 7412   | VCAM1    | vascular cell adhesion molecule 1                           | 0.92969502   | 0.00128322  | 0.32739692       | 0.188376999     | 1448162_at   | 22329  | Vcam1         | vascular cell adhesion molecule 1                             | 2.131003103     | 8.24E-06       |
| 208782_at   | 11167  | FSTL1    | folliculin-like 1                                           | 0.959623604  | 1.71E-05    | -0.335761343     | 0.029613024     | 1416221_at   | 14314  | Fstl1         | folliculin-like 1                                             | 0.737923536     | 0.000341342    |
| 217771_at   | 51280  | GOLM1    | golgi membrane protein 1                                    | 0.394014296  | 0.006043545 | 0.261940155      | 0.205355338     | 1415698_at   | 105348 | Golm1         | golgi membrane protein 1                                      | 0.78560723      | 0.000411236    |
| 204319_s_at | 6001   | RGS10    | regulator of G-protein signaling 10                         | 1.147256685  | 1.35E-05    | -0.230489144     | 0.159663288     | 1416882_at   | 67865  | Rgs10         | regulator of G-protein signalling 10                          | 0.878633268     | 0.000413961    |
| 209030_s_at | 23705  | CADM1    | cell adhesion molecule 1                                    | 0.444430578  | 0.00047078  | 0.324395311      | 0.054075384     | 1417378_at   | 54725  | Cadm1         | cell adhesion molecule 1                                      | 1.012454787     | 9.45E-06       |
| 216237_s_at | 4174   | MCM5     | minichromosome maintenance complex component 5              | 0.510224232  | 0.000613895 | 0.262966208      | 0.342754019     | 1436808_x_at | 17218  | Mcm5          | minichromosome maintenance deficient 5, cell division cycle 4 | 1.047530401     | 0.003209407    |
| 213503_x_at | 302    | ANXA2    | annexin A2                                                  | 0.850680352  | 0.00106559  | -0.140031474     | 0.138288073     | 1419091_a_at | 12306  | Anxa2         | annexin A2                                                    | 0.738097147     | 0.003056597    |
| 204237_at   | 51454  | GULP1    | GULP, engulfment adaptor PTB domain containing 1            | 0.345601308  | 0.001626259 | -0.257640719     | 0.107739471     | 1434423_at   | 70676  | Gulp1         | GULP, engulfment adaptor PTB domain containing 1              | 0.561231632     | 0.048517236    |
| 202659_s_at | 6599   | PSMB10   | proteasome (prosome, macropain) subunit, beta type, 10      | 0.864025659  | 0.000931393 | 0.151283992      | 0.767527716     | 1448632_at   | 19171  | Psmb10        | proteasome (prosome, macropain) subunit, beta type 10         | 0.998929055     | 3.64E-05       |
| 207016_s_at | 8854   | ALDH1A2  | aldehyde dehydrogenase 1 family, member A2                  | 0.506003298  | 0.006236138 | 0.203802842      | 0.329457023     | 1422709_at   | 19378  | Alhd1a2       | aldehyde dehydrogenase family 1, subfamily A2                 | 0.887825675     | 0.000628761    |
| 210993_s_at | 4086   | SMAD1    | SMAD family member 1                                        | 0.699614878  | 7.34E-07    | 0.157689415      | 0.505201307     | 1459843_s_at | 17125  | Smad1         | SMAD homolog 1 (Drosophila)                                   | 0.756912615     | 0.001164941    |
| 201923_at   | 10549  | PRDX4    | peroxiredoxin 4                                             | 0.327128237  | 0.018339356 | 0.150045194      | 0.370730771     | 1416166_a_at | 53381  | Prdx4         | peroxiredoxin 4                                               | 0.536216491     | 0.025846381    |
| 202068_at   | 25800  | SLC39A6  | solute carrier family 39 (zinc transporter), member 6       | 0.712390752  | 1.89E-05    | 0.309453958      | 0.008718834     | 1424674_at   | 106957 | Slc39a6       | solute carrier family 39 (metal ion transporter), member 6    | 0.639007776     | 0.005259751    |
| 221802_s_at | 57698  | KIAA1598 | KIAA1598                                                    | 0.485694377  | 0.001593284 | 0.146595461      | 0.40864692      | 1429055_at   | 71653  | 4930506M07RIK | RIKEN cDNA 4930506M07 gene                                    | 0.643381157     | 0.000171956    |
| 201930_at   | 4175   | MCM6     | minichromosome maintenance complex component 6              | 0.418505605  | 0.003937833 | -0.509166725     | 0.004592352     | 1438852_x_at | 17219  | Mcm6          | minichromosome maintenance deficient 6 (MIS5 homolog, S. p    | 0.925461275     | 0.006852243    |
| 202075_s_at | 5360   | PLTP     | phospholipid transfer protein                               | 1.229718754  | 0.006991959 | -0.825071396     | 1.11E-05        | 1417963_at   | 18830  | Ptp           | phospholipid transfer protein                                 | 0.761605896     | 0.010171465    |
| 203021_at   | 6590   | SLPI     | secretory leukocyte peptidase inhibitor                     | 1.012325042  | 0.013006809 | -0.362373868     | 0.297548268     | 1448377_at   | 20568  | Slpi          | secretory leukocyte peptidase inhibitor                       | 1.13E-05        | 0.017889632    |
| 201201_at   | 1476   | CSTB     | cystatin B (stefin B)                                       | 0.58254515   | 0.002307508 | 0.20583407       | 0.402954026     | 1422506_a_at | 13014  | Cstb          | cystatin B                                                    | 0.468050897     | 0.008824639    |
| 203892_at   | 10406  | WFDC2    | WAP four-disulfide core domain 2                            | 1.208724618  | 0.000255446 | 0.224657122      | 0.553737145     | 1424351_at   | 67701  | Wfdc2         | WAP four-disulfide core domain 2                              | 0.020964919     | 0.012363558    |
| 201555_at   | 4172   | MCM3     | minichromosome maintenance complex component 3              | 0.532974268  | 6.14E-06    | 0.09122907       | 0.507367185     | 1420028_s_at | 17215  | Mcm3          | minichromosome maintenance deficient 3 (S. cerevisiae)        | 0.730710073     | 0.000512231    |
| 208858_s_at | 23344  | ESYT1    | extended synaptotagmin-like protein 1                       | 0.431914331  | 0.005363682 | -0.019188588     | 0.882369252     | 1451099_at   | 23943  | Eys1          | extended synaptotagmin-like protein 1                         | 0.4954645       | 0.002505444    |
| 200644_at   | 65108  | MARCKS1  | MARCKS-like 1                                               | 0.599736145  | 0.001133213 | 0.241742278      | 0.165263794     | 1437226_x_at | 17357  | Marcksl1      | MARCKS-like 1                                                 | 1.137348334     | 1.05E-06       |
| 204533_at   | 3627   | CXCL10   | chemokine (C-X-C motif) ligand 10                           | 1.1620892    | 0.004823826 | 1.159823884      | 0.052824928     | 1418930_at   | 15945  | Cxcl10        | chemokine (C-X-C motif) ligand 10                             | 1.473897758     | 0.000881478    |
| 201646_at   | 950    | SCARB2   | scavenger receptor class B, member 2                        | 0.484824283  | 0.000679538 | 0.136034741      | 0.075210126     | 1460235_at   | 12492  | Scarb2        | scavenger receptor class B, member 2                          | 0.455530969     | 0.000165497    |
| 209016_s_at | 3855   | KRT7     | keratin 7                                                   | 0.616350075  | 0.005478225 | -0.599615444     | 0.020106679     | 1423952_a_at | 110310 | Krt7          | keratin 7                                                     | 0.621552686     | 0.003215516    |
| 216905_s_at | 6768   | ST14     | suppression of tumorigenicity 14 (colon carcinoma)          | 0.326936078  | 0.01328477  | 0.09840613       | 0.613078539     | 1418076_at   | 19143  | St14          | suppression of tumorigenicity 14 (colon carcinoma)            | 0.324389201     | 0.041838011    |
| 203824_at   | 7103   | TSPAN8   | tetraspanin 8                                               | 0.702588406  | 0.04709945  | -0.168709773     | 0.614929743     | 1420018_s_at | 216350 | Tspan8        | tetraspanin 8                                                 | 0.967544969     | 0.002962601    |
| 201426_s_at | 7431   | VIM      | vimentin                                                    | 1.140734287  | 0.000128674 | -0.072668247     | 0.544368017     | 1456292_a_at | 22352  | Vim           | vimentin                                                      | 1.323614273     | 8.46E-06       |
| 209118_s_at | 7846   | TUBA1A   | tubulin, alpha 1A                                           | 0.668854671  | 0.048575247 | 0.297132978      | 0.161221149     | 1418884_x_at | 22142  | Tuba1a        | tubulin, alpha 1A                                             | 0.808563626     | 0.001359716    |
| 203476_at   | 7162   | TPBG     | trophoblast glycoprotein                                    | 0.686380452  | 0.000543904 | -0.208700712     | 0.264591698     | 1423311_s_at | 21983  | Tpbg          | trophoblast glycoprotein                                      | 0.327191289     | 0.041044826    |
| 212320_at   | 203068 | TUBB     | tubulin, beta class I                                       | 0.362465472  | 0.005012184 | 0.063824341      | 0.678922515     | 1416256_a_at | 22154  | Tubb5         | tubulin, beta 5 class I                                       | 0.706898128     | 7.12E-05       |
| 212609_s_at | 10000  | AKT3     | v-akt murine thymoma viral oncogene homolog 3 (protei       | 0.48742525   | 0.000519446 | -0.18372828      | 0.291592248     | 1435879_at   | 23797  | Akt3          | thymoma viral proto-oncogene 3                                | 0.329115732     | 0.001010228    |
| 201650_at   | 3880   | KRT19    | keratin 19                                                  | 0.640501344  | 0.015926837 | -0.421598867     | 0.451723543     | 1417156_at   | 16689  | Krt19         | keratin 19                                                    | 0.759270987     | 0.004766906    |
| 212592_at   | 3512   | IGJ      | immunoglobulin J polypeptide, linker protein for immunc     | 1.513685539  | 0.005054426 | 0.833296119      | 0.223692134     | 1424305_at   | 18089  | Igj           | immunoglobulin joining chain                                  | 1.698862241     | 7.35E-05       |
| 202310_s_at | 1277   | COL1A1   | collagen, type I, alpha 1                                   | 0.54777558   | 0.014929857 | 0.271420943      | 0.049888575     | 1423669_at   | 12842  | Col1a1        | collagen, type I, alpha 1                                     | 1.304987481     | 0.006376809    |
| 201645_at   | 3371   | TNC      | tenascin C                                                  | 1.293460249  | 0.000286718 | 0.454701886      | 0.189331112     | 1416342_at   | 21923  | Tnc           | tenascin C                                                    | 0.760470362     | 0.000754575    |
| 221766_s_at | 55603  | FAM46A   | family with sequence similarity 46, member A                | 0.457088566  | 0.001037906 | 0.245447916      | 0.293003029     | 1437868_at   | 212943 | Fam46a        | family with sequence similarity 46, member A                  | 0.951807301     | 9.41E-05       |
| 202006_at   | 5782   | PTPN12   | protein tyrosine phosphatase, non-receptor type 12          | 0.445447903  | 0.000623721 | 0.321226345      | 0.120195523     | 1422045_a_at | 19248  | Ptpn12        | protein tyrosine phosphatase, non-receptor type 12            | 0.491337467     | 0.032739874    |
| 203281_s_at | 7138   | UBA7     | ubiquitin-like modifier activating enzyme 7                 | 0.91162371   | 5.90E-05    | 0.360279958      | 0.250161567     | 1426971_at   | 74153  | Uba7          | ubiquitin-like modifier activating enzyme 7                   | 0.673410913     | 0.003299275    |
| 218854_at   | 29940  | DSE      | dermatan sulfate epimerase                                  | 0.808304065  | 0.001167149 | 0.283196239      | 0.036972861     | 1455795_at   | 212898 | Dse           | dermatan sulfate epimerase                                    | 0.655991272     | 0.003583369    |
| 201084_s_at | 9774   | BCLAF1   | BCL2-associated transcription factor 1                      | 0.375895689  | 0.002161835 | 0.074257327      | 0.614822959     | 1428844_a_at | 72567  | Bclaf1        | BCL2-associated transcription factor 1                        | 0.44117746      | 0.001832799    |
| 212829_at   | 5305   | PIPK4A2  | phosphatidylinositol-5-phosphate 4-kinase, type II, alpha   | 0.386898278  | 0.005221681 | 0.40667471       | 0.081570678     | 1419279_at   | 18718  | Pipk4a2       | phosphatidylinositol-5-phosphate 4-kinase, type II, alpha     | 0.751302411     | 0.000148829    |
| 204437_s_at | 1545   | CYP1B1   | cytochrome P450, family 1, subfamily B, polypeptide 1       | 0.847370835  | 0.007458163 | -0.16398032      | 0.64027776      | 1416612_at   | 13078  | Cyp1b1        | cytochrome P450, family 1, subfamily B, polypeptide 1         | 0.739547393     | 0.000256773    |
| 202727_s_at | 3459   | IFNGR1   | interferon gamma receptor 1                                 | 0.563306313  | 0.000154575 | 0.401875399      | 0.054863212     | 1448167_at   | 15979  | Ifngr1        | interferon gamma receptor 1                                   | 0.61535918      | 0.000682287    |
| 213094_at   | 57211  | GPR126   | G protein-coupled receptor 126                              | 0.408424996  | 0.01912999  | -0.194416803     | 0.508205312     | 1437409_s_at | 215798 | Gpr126        | G protein-coupled receptor 126                                | 0.597794685     | 0.000831094    |
| 219004_s_at | 54609  | MIS18A   | MIS18 kinetochore protein homolog A (S. pombe)              | 0.379578539  | 0.00053202  | 0.10539095       | 0.368779311     | 1453314_x_at | 66578  | 2610039C10RIK | RIKEN cDNA 2610039C10 gene                                    | 0.67746601      | 5.28E-05       |
| 203570_at   | 4016   | LOXL1    | lysyl oxidase-like 1                                        | 1.062376161  | 2.59E-05    | -0.267145251     | 0.266218177     | 1451978_at   | 16949  | Loxl1         | lysyl oxidase-like 1                                          | 0.482703269     | 0.012596242    |
| 209369_at   | 306    | ANXA3    | annexin A3                                                  | 0.818972539  | 0.001195069 | 0.138987399      | 0.679829252     | 1460330_at   | 11745  | Anxa3         | annexin A3                                                    | 1.364692489     | 0.000201281    |
| 203256_at   | 1001   | CDH3     | cadherin 3, type 1, P-cadherin (placental)                  | 0.405867598  | 0.002744612 | 0.051221821      | 0.773355698     | 1426673_at   | 12560  | Cdh3          | cadherin 3                                                    | 0.433357961     | 0.039252077    |
| 200999_s_at | 10970  | CKAP4    | cytoskeleton-associated protein 4                           | 0.458789648  | 0.001214107 | -0.038469737     | 0.88878665      | 1426755_at   | 216197 | Ckap4         | cytoskeleton-associated protein 4                             | 0.559900717     | 0.005490609    |
| 204871_s_at | 22881  | ANKRD6   | ankyrin repeat domain 6                                     | 0.474864591  | 0.000227428 | 0.2787802        | 0.03234028      | 1437217_at   | 140577 | Ankrd6        | ankyrin repeat domain 6                                       | 0.753822272     | 0.000247424    |
| 203083_at   | 7058   | THBS2    | thrombospondin 2                                            | 0.531334149  | 0.006898721 | 0.391084416      | 0.050373371     | 1422571_at   | 21826  | Thbs2         | thrombospondin 2                                              | 0.749014097     | 0.003261948    |
| 209417_s_at | 3430   | IFI35    | interferon-induced protein 35                               | 1.170262031  | 6.42E-06    | 0.878565535      | 0.081284        |              |        |               |                                                               |                 |                |

|             |               |                                                         |             |             |              |             |              |                |                                                             |             |             |
|-------------|---------------|---------------------------------------------------------|-------------|-------------|--------------|-------------|--------------|----------------|-------------------------------------------------------------|-------------|-------------|
| 202686_s_at | 558 AXL       | AXL receptor tyrosine kinase                            | 1.107901663 | 5.94E-05    | 0.25595041   | 0.282979823 | 1423586_at   | 26362 Axl      | AXL receptor tyrosine kinase                                | 0.706254948 | 0.000698588 |
| 201012_at   | 301 ANXA1     | annexin A1                                              | 1.046079962 | 0.001246234 | 0.312901247  | 0.160874581 | 1448213_at   | 16952 Anxa1    | annexin A1                                                  | 1.291820701 | 3.25E-05    |
| 213693_s_at | 4582 MUC1     | mucin 1, cell surface associated                        | 0.397271111 | 0.018212714 | -0.524522259 | 0.081460215 | 1449199_at   | 17829 Muc1     | mucin 1, transmembrane                                      | 0.347763956 | 0.012415601 |
| 201761_at   | 10797 MTHFD2  | methylene tetrahydrofolate dehydrogenase (NADP+ depe    | 0.658323235 | 0.008508986 | -0.227353351 | 0.246833999 | 1419254_at   | 17768 Mthfd2   | methylene tetrahydrofolate dehydrogenase (NAD+ dependent)   | 0.826868886 | 2.30E-05    |
| 215111_s_at | 8848 TSC22D1  | TSC22 domain family, member 1                           | 0.327632549 | 0.003430629 | 0.11571199   | 0.378554526 | 1454758_a_at | 21807 Tsc2d1   | TSC22 domain family, member 1                               | 0.785727548 | 0.007986487 |
| 218404_at   | 29887 SNX10   | sorting nexin 10                                        | 0.35705976  | 0.03694944  | 0.265921192  | 0.209724091 | 1431055_a_at | 71982 Snx10    | sorting nexin 10                                            | 0.383835415 | 0.010958113 |
| 212509_s_at | 439921 MXRA7  | matrix-remodelling associated 7                         | 0.381342237 | 0.014553663 | -0.128025524 | 0.310204908 | 1440975_at   | 67622 Mxra7    | matrix-remodelling associated 7                             | 0.708775586 | 0.00128744  |
| 217733_s_at | 9168 TMSB10   | thymosin beta 10                                        | 0.852586491 | 0.000428168 | 0.333603514  | 0.191048593 | 1436902_x_at | 19240 Tmsb10   | thymosin, beta 10                                           | 1.508928909 | 2.30E-05    |
| 205831_at   | 914 CD2       | CD2 molecule                                            | 0.515638321 | 0.005928875 | 0.41507187   | 0.226366846 | 1418770_at   | 12481 Cd2      | CD2 antigen                                                 | 0.667975038 | 0.007619104 |
| 203969_x_at | 2149 F2R      | coagulation factor II (thrombin) receptor               | 0.653138212 | 0.000116005 | 0.102629849  | 0.620950502 | 1437308_s_at | 14062 F2r      | coagulation factor II (thrombin) receptor                   | 1.412313882 | 4.53E-05    |
| 201202_at   | 5111 PCNA     | proliferating cell nuclear antigen                      | 0.353203927 | 0.001594636 | 0.317061922  | 0.001313418 | 1417947_at   | 18538 PcnA     | proliferating cell nuclear antigen                          | 0.439967478 | 0.002597859 |
| 203186_s_at | 6275 S100A4   | S100 calcium binding protein A4                         | 0.717578719 | 0.000370629 | 0.499245693  | 0.136794126 | 1424542_at   | 20198 S100a4   | S100 calcium binding protein A4                             | 1.334282492 | 3.83E-05    |
| 205308_at   | 51101 ZC2HC1A | zinc finger, C2HC-type containing 1A                    | 0.334137467 | 0.000555483 | -0.295081294 | 0.056651269 | 1428417_at   | 67306 Fam164a  | family with sequence similarity 164, member A               | 0.471935793 | 0.036062344 |
| 218158_s_at | 26060 APPL1   | adaptor protein, phosphotyrosine interaction, PH domain | 0.336250353 | 0.015076198 | 0.171298071  | 0.142998458 | 1427190_at   | 72993 Appl1    | adaptor protein, phosphotyrosine interaction, PH domain and | 0.436733963 | 0.003868917 |
| 218348_s_at | 29066 ZC3H7A  | zinc finger CCH-type containing 7A                      | 0.497377824 | 1.99E-06    | -0.152311612 | 0.363770582 | 1419898_s_at | 106205 Zc3h7a  | zinc finger CCH type containing 7 A                         | 0.490648725 | 0.001249099 |
| 201850_at   | 822 CAPG      | capping protein (actin filament), gelsolin-like         | 0.57127063  | 0.002374094 | 0.534972887  | 0.086949687 | 1450355_a_at | 12332 Capg     | capping protein (actin filament), gelsolin-like             | 0.509808664 | 0.009211796 |
| 205729_at   | 9180 OSMR     | oncostatin M receptor                                   | 0.403485585 | 0.017186012 | 0.176846326  | 0.351712626 | 1418674_at   | 18414 Osmr     | oncostatin M receptor                                       | 1.718203674 | 1.98E-05    |
| 209264_s_at | 7106 TSPAN4   | tetraspanin 4                                           | 0.547077073 | 8.54E-05    | -0.536017737 | 0.259715748 | 1448276_at   | 64540 Tspan4   | tetraspanin 4                                               | 0.663744141 | 0.004369249 |
| 212483_at   | 25836 NIPBL   | Nipped-B homolog (Drosophila)                           | 0.491186296 | 6.13E-06    | 0.071228881  | 0.674272822 | 1442103_at   | 71175 Nipbl    | Nipped-B homolog (Drosophila)                               | 0.358104762 | 0.025846381 |
| 217857_s_at | 9939 RBM8A    | RNA binding motif protein 8A                            | 0.338187366 | 4.42E-05    | -0.273490477 | 0.24421223  | 1418119_at   | 60365 Rbm8a    | RNA binding motif protein 8a                                | 0.333529709 | 0.019382194 |
| 218656_s_at | 10186 LHFP    | lipoma HMGIC fusion partner                             | 0.997680387 | 0.00027612  | 0.251989983  | 0.101881066 | 1433776_at   | 108927 Lhfp    | lipoma HMGIC fusion partner                                 | 0.468798347 | 0.013655943 |
| 209536_s_at | 30844 EHD4    | EH-domain containing 4                                  | 0.350246703 | 0.012999903 | -0.807946493 | 0.001716907 | 1449852_a_at | 98878 Ehd4     | EH-domain containing 4                                      | 0.365628698 | 0.003886759 |
| 206641_at   | 608 TNFRSF17  | tumor necrosis factor receptor superfamily, member 17   | 0.572877789 | 0.047054122 | 0.29677002   | 0.270415881 | 1420782_at   | 21935 Tnfrsf17 | tumor necrosis factor receptor superfamily, member 17       | 0.519171089 | 0.02389328  |
| 218248_at   | 63901 FAM111A | family with sequence similarity 111, member A           | 0.398227184 | 2.80E-05    | 0.207299219  | 0.05940958  | 1422628_at   | 107373 Fam111a | family with sequence similarity 111, member A               | 0.913192803 | 3.90E-05    |
| 213506_at   | 2150 F2RL1    | coagulation factor II (thrombin) receptor-like 1        | 0.543999713 | 0.000922298 | -0.626478557 | 0.077659104 | 1448931_at   | 14063 F2rl1    | coagulation factor II (thrombin) receptor-like 1            | 0.601323276 | 0.012239755 |
| 217728_at   | 6277 S100A6   | S100 calcium binding protein A6                         | 0.519652155 | 0.001142381 | -0.771804757 | 0.039120668 | 1421375_a_at | 20200 S100a6   | S100 calcium binding protein A6 (calyculin)                 | 1.171789567 | 5.15E-05    |
| 212418_at   | 1997 ELF1     | E74-like factor 1 (ets domain transcription factor)     | 0.514876462 | 0.000169038 | 0.102960857  | 0.6080677   | 1417540_at   | 13709 Elf1     | E74-like factor 1                                           | 0.428876689 | 0.009110136 |
| 201136_at   | 5355 PLP2     | proteolipid protein 2 (colonic epithelium-enriched)     | 0.581499179 | 0.005093135 | 0.250348711  | 0.070983529 | 1453572_a_at | 18824 Plp2     | proteolipid protein 2                                       | 0.811454873 | 0.000530015 |
| 211963_s_at | 10092 ARPC5   | actin related protein 2/3 complex, subunit 5, 16kDa     | 0.40477492  | 0.001114696 | 0.297035911  | 0.009204486 | 1448129_at   | 67771 Arpc5    | actin related protein 2/3 complex, subunit 5                | 0.445857127 | 0.001623462 |
| 211122_s_at | 6373 CXCL11   | chemokine (C-X-C motif) ligand 11                       | 0.354882228 | 0.023468337 | 0.195142413  | 0.419403614 | 1419697_at   | 56066 Cxcl11   | chemokine (C-X-C motif) ligand 11                           | 0.777225484 | 0.018168872 |
| 209436_at   | 10418 SPON1   | spondin 1, extracellular matrix protein                 | 0.612781415 | 0.023348307 | 0.111682358  | 0.538955733 | 1451342_at   | 233744 Spon1   | spondin 1, (f-spondin) extracellular matrix protein         | 0.74047458  | 9.74E-06    |

**Supplemental Table 5: Genes utilized for the Glomerulus & Tubulointerstitial gene set as detailed in the methods.**

SUPPLEMENTAL TABLE 5

| probeset    | ID     | symbol   | desc                                                             | Tubule.logFC | Tubule.adpP | Glomerulus.logFC | Glomerulus.adpP | probeset.1   | ID.1   | symbol.1      | desc.1                                                          | Nephritis.logFC | Nephritis.adpP |
|-------------|--------|----------|------------------------------------------------------------------|--------------|-------------|------------------|-----------------|--------------|--------|---------------|-----------------------------------------------------------------|-----------------|----------------|
| 202503_s_at | 9768   | KIAA0101 | KIAA0101                                                         | 1.033247219  | 0.001272198 | 0.726121324      | 0.000149622     | 1419153_at   | 68026  | 2810417H13Rik | RIKEN cDNA 2810417H13 gene                                      | 1.005200802     | 0.001998177    |
| 202391_at   | 10409  | BAAP1    | brain abundant, membrane attached signal protein 1               | 0.689964881  | 0.00086224  | 1.257020501      | 0.000716405     | 1428572_at   | 70350  | Basp1         | brain abundant, membrane attached signal protein 1              | 1.330565349     | 0.000176602    |
| 202145_at   | 4061   | LY6E     | lymphocyte antigen 6 complex, locus E                            | 0.894923044  | 0.000125281 | 1.106215155      | 0.000375245     | 1453304_s_at | 17069  | Ly6e          | lymphocyte antigen 6 complex, locus E                           | 1.467196012     | 1.43E-05       |
| 212646_at   | 23180  | RFTN1    | raftlin, lipid raft linker 1                                     | 0.817834263  | 1.84E-05    | 0.759464382      | 3.68E-06        | 1428696_at   | 76438  | Rftn1         | raftlin lipid raft linker 1                                     | 0.470587144     | 0.000362846    |
| 217502_at   | 3433   | IFIT2    | interferon-induced protein with tetratricopeptide repeats 2      | 1.117007117  | 7.71E-07    | 1.272635391      | 2.62E-05        | 1418293_at   | 15958  | Ifit2         | interferon-induced protein with tetratricopeptide repeats 2     | 0.958444463     | 0.000457131    |
| 204912_at   | 3587   | IL10RA   | interleukin 10 receptor, alpha                                   | 0.463367325  | 0.006558181 | 2.090412381      | 4.10E-08        | 1448731_at   | 16154  | Il10ra        | interleukin 10 receptor, alpha                                  | 0.627236366     | 0.000244669    |
| 218943_s_at | 23586  | DDX58    | DEAD (Asp-Glu-Ala-Asp) box polypeptide 58                        | 1.501567077  | 1.60E-06    | 1.751834707      | 7.90E-07        | 1436562_at   | 230073 | Ddx58         | DEAD (Asp-Glu-Ala-Asp) box polypeptide 58                       | 0.484759006     | 0.006158649    |
| 218729_at   | 56925  | LXN      | latexin                                                          | 0.501814445  | 0.00010536  | 0.588377412      | 0.004692428     | 1416503_at   | 17035  | Lxn           | latexin                                                         | 0.856077185     | 3.86E-05       |
| 206271_at   | 7098   | TLR3     | tolllike receptor 3                                              | 1.036188736  | 1.92E-07    | 0.551792447      | 0.004951147     | 1422782_s_at | 142880 | Tlr3          | tolllike receptor 3                                             | 0.385946673     | 0.003144623    |
| 201664_at   | 10051  | SMC4     | structural maintenance of chromosomes 4                          | 0.514176238  | 8.18E-06    | 0.60561335       | 0.000130283     | 1427275_at   | 70099  | Smc4          | structural maintenance of chromosomes 4                         | 0.57961406      | 0.020633428    |
| 211719_x_at | 2335   | FN1      | fibronectin 1                                                    | 1.736356433  | 8.18E-08    | 2.836749051      | 1.50E-07        | 1426642_at   | 14268  | Fn1           | fibronectin 1                                                   | 0.912943017     | 0.002081531    |
| 216202_s_at | 9517   | SPTLC2   | serine palmitoyltransferase, long chain base subunit 2           | 0.440217801  | 0.002416638 | 0.536455286      | 0.023858476     | 1460243_at   | 20773  | Sptlc2        | serine palmitoyltransferase, long chain base subunit 2          | 0.682824667     | 0.005920936    |
| 219684_at   | 64108  | RTP4     | receptor (chemosensory) transporter protein 4                    | 1.610122992  | 8.18E-08    | 1.59461357       | 7.97E-07        | 1418580_at   | 67775  | Rtp4          | receptor transporter protein 4                                  | 1.521883669     | 2.04E-05       |
| 204026_s_at | 11130  | ZWINT    | ZW10 interactor                                                  | 0.479488426  | 0.01206264  | 0.521002604      | 0.001781596     | 1427539_s_at | 52696  | Zwint         | ZW10 interactor                                                 | 0.19061465      | 0.000949261    |
| 203416_at   | 963    | CD53     | CD53 molecule                                                    | 1.189080494  | 0.000160405 | 2.791423406      | 5.54E-10        | 1448617_at   | 12508  | CD53          | CD53 antigen                                                    | 2.174374794     | 1.96E-06       |
| 209083_at   | 11151  | CORO1A   | coronin, actin binding protein, 1A                               | 0.53898156   | 0.01364791  | 1.840192975      | 6.37E-07        | 1455269_s_at | 12721  | Coro1a        | coronin, actin binding protein 1A                               | 2.080904378     | 9.45E-06       |
| 202878_s_at | 22918  | CD93     | CD93 molecule                                                    | 0.586338039  | 0.003744562 | 1.16168689       | 1.69E-05        | 1419589_at   | 17064  | CD93          | CD93 antigen                                                    | 0.711739654     | 0.000206054    |
| 218966_s_at | 55601  | DDX60    | DEAD (Asp-Glu-Ala-Asp) box polypeptide 60                        | 1.9199959    | 1.13E-09    | 1.013577472      | 1.47E-05        | 1451777_at   | 234311 | Ddx60         | DEAD (Asp-Glu-Ala-Asp) box polypeptide 60                       | 0.583113208     | 0.0016915806   |
| 203964_at   | 9111   | NMI      | N-myc (and STAT) interactor                                      | 1.478718957  | 1.15E-08    | 1.694297777      | 8.83E-11        | 1425719_s_at | 64685  | Nmi           | N-myc (and STAT) interactor                                     | 0.715465192     | 0.000542228    |
| 213170_at   | 2882   | GPIX     | glutathione peroxidase 7                                         | 0.691466626  | 2.35E-05    | 0.37371732       | 0.023426907     | 1417836_at   | 67305  | Gpx7          | glutathione peroxidase 7                                        | 0.335749862     | 0.031166114    |
| 205898_at   | 1524   | CX3CR1   | chemokine (C-X3-C motif) receptor 1                              | 0.983423579  | 0.000046426 | 2.19102466       | 3.20E-07        | 1450020_at   | 13051  | Cx3cr1        | chemokine (C-X3-C) receptor 1                                   | 1.163768513     | 0.000418984    |
| 214467_at   | 8477   | GPR65    | G protein-coupled receptor 65                                    | 0.40371404   | 0.002311787 | 1.698215001      | 1.28E-06        | 1449175_at   | 14744  | Gpr65         | G-protein coupled receptor 65                                   | 1.197675361     | 0.001135294    |
| 206102_at   | 9837   | GINS1    | GINS complex subunit 1 (Psf1 homolog)                            | 0.458115711  | 0.000645044 | 0.532552001      | 0.007051241     | 1452598_at   | 69250  | Gins1         | GINS complex subunit 1 (Psf1 homolog)                           | 0.682017673     | 0.003227899    |
| 202404_s_at | 1278   | COL1A2   | collagen, type I, alpha 2                                        | 1.231899012  | 0.000224654 | 2.536933473      | 2.70E-07        | 1423110_at   | 12823  | Col1a2        | collagen, type I, alpha 2                                       | 1.210652381     | 0.001542622    |
| 208998_at   | 7351   | UCP2     | uncoupling protein 2 (mitochondrial, proton carrier)             | 0.699468781  | 0.007255159 | 1.982475229      | 1.54E-08        | 1459740_s_at | 22228  | Ucp2          | uncoupling protein 2 (mitochondrial, proton carrier)            | 0.866093431     | 0.002100585    |
| 208018_s_at | 3055   | HCK      | hemopoietic cell kinase                                          | 0.494346473  | 0.005117471 | 2.670998803      | 7.74E-10        | 1449455_at   | 15162  | Hck           | hemopoietic cell kinase                                         | 1.707258182     | 1.50E-05       |
| 204567_s_at | 9619   | ABCG1    | ATP-binding cassette, sub-family G (WHITE), member 1             | 1.034487242  | 0.000454568 | 1.017012209      | 0.000216272     | 1423570_at   | 11307  | Abcg1         | ATP-binding cassette, sub-family G (WHITE), member 1            | 0.526093789     | 0.000801275    |
| 211967_at   | 114808 | TMEM123  | transmembrane protein 123                                        | 0.54492663   | 0.015856035 | 0.518080858      | 1.92E-05        | 1417222_s_at | 71929  | Tmem123       | transmembrane protein 123                                       | 0.582344419     | 0.015029597    |
| 211368_s_at | 834    | CASP1    | caspace 1, apoptosis-related cysteine peptidase                  | 1.317621586  | 7.98E-06    | 1.950132948      | 6.06E-11        | 1449265_at   | 12362  | Casp1         | caspace 1                                                       | 0.819601461     | 0.000609822    |
| 205660_at   | 8638   | OASL     | 2'-5'-oligoadenylate synthetase-like                             | 0.370260452  | 0.024624139 | 1.434661863      | 1.43E-05        | 1424339_at   | 231655 | Oasl1         | 2'-5' oligoadenylate synthetase-like 1                          | 0.721941033     | 0.001754917    |
| 209906_at   | 719    | C3AR1    | complement component 3a receptor 1                               | 0.509219191  | 0.006416373 | 2.500750367      | 2.36E-09        | 1442082_at   | 12267  | C3ar1         | complement component 3a receptor 1                              | 0.612732902     | 1.88E-05       |
| 207181_s_at | 840    | CASP7    | caspace 7, apoptosis-related cysteine peptidase                  | 0.328468479  | 0.001757388 | 0.763948038      | 3.19E-07        | 1448659_at   | 12369  | Casp7         | caspace 7                                                       | 0.367217432     | 0.005939696    |
| 213603_s_at | 5880   | RAC2     | ras-related C3 botulinum toxin substrate 2 (rho family, small G  | 0.563893159  | 0.01523435  | 1.740257169      | 1.72E-06        | 1417620_at   | 19354  | Rac2          | RAS-related C3 botulinum substrate 2                            | 1.159199965     | 0.000358448    |
| 201105_at   | 3956   | LGALS1   | lectin, galactoside-binding, soluble, 1                          | 1.00399531   | 0.82E-05    | 0.657466942      | 0.001616235     | 1455439_s_at | 16852  | Lgals1        | lectin, galactose binding, soluble 1                            | 0.730296568     | 0.000588621    |
| 203729_at   | 2014   | EMP3     | epithelial membrane protein 3                                    | 0.828875098  | 4.62E-05    | 1.363630835      | 1.31E-07        | 1417104_at   | 13732  | Emp3          | epithelial membrane protein 3                                   | 0.809486004     | 0.000201281    |
| 202957_at   | 3059   | HCLS1    | hematopoietic cell-specific Lyn substrate 1                      | 1.02593519   | 0.000696547 | 2.114744036      | 3.22E-10        | 1418842_at   | 15163  | Hcls1         | hematopoietic cell specific Lyn substrate 1                     | 1.177033578     | 2.03E-05       |
| 210895_s_at | 942    | CD86     | CD86 molecule                                                    | 0.546282557  | 0.008909304 | 1.487664385      | 1.10E-05        | 1449858_at   | 12524  | CD86          | CD86 antigen                                                    | 0.712427818     | 0.001893034    |
| 203922_s_at | 1536   | CYBB     | cytochrome b-245, beta polypeptide                               | 0.666253166  | 0.002322846 | 2.145561029      | 8.36E-10        | 1436778_at   | 13058  | Cybb          | cytochrome b-245, beta polypeptide                              | 1.884636833     | 6.88E-07       |
| 204972_at   | 4939   | OAS2     | 2'-5'-oligoadenylate synthetase 2, 69/71kDa                      | 0.83902985   | 0.00052798  | 2.504666028      | 2.74E-11        | 1425065_at   | 246728 | Oas2          | 2'-5' oligoadenylate synthetase 2                               | 0.415148936     | 0.007010156    |
| 219209_at   | 64135  | IFIH1    | interferon induced with helicase C domain 1                      | 1.676093171  | 5.97E-09    | 2.125691229      | 4.30E-10        | 1426276_at   | 71586  | Ifih1         | interferon induced with helicase C domain 1                     | 0.884067897     | 4.49E-05       |
| 202157_s_at | 10659  | CELF2    | CUGBP, Elav-like family member 2                                 | 0.418482831  | 0.045475348 | 1.219559043      | 3.99E-06        | 1451154_s_at | 14007  | Celf2         | CUGBP, Elav-like family member 2                                | 0.820433874     | 0.001541956    |
| 220390_s_at | 64092  | SAMSN1   | SAM domain, SH3 domain and nuclear localization signals 1        | 0.639018483  | 0.002727143 | 1.792359086      | 1.71E-05        | 1421457_s_at | 67742  | Samsn1        | SAM domain, SH3 domain and nuclear localization signals, 1      | 0.666287478     | 0.000647509    |
| 203300_x_at | 8905   | AP152    | adaptor-related protein complex 1, sigma 2 subunit               | 0.590657112  | 0.000616859 | 0.787891857      | 2.48E-05        | 1447903_s_at | 108012 | Ap1s2         | adaptor-related protein complex 1, sigma 2 subunit              | 1.361659965     | 6.78E-06       |
| 209606_at   | 9595   | CYTP     | cytohesin 1 interacting protein                                  | 0.382413844  | 0.037865917 | 1.701695796      | 4.89E-06        | 1435697_s_at | 227929 | Cytp          | cytohesin 1 interacting protein                                 | 0.53176374      | 0.005827295    |
| 201288_at   | 397    | ARHGDI8  | Rho GDP dissociation inhibitor (GDI) beta                        | 1.028868546  | 7.58E-05    | 0.962068695      | 4.74E-06        | 1426454_at   | 11857  | Arhgd1b       | Rho, GDP dissociation inhibitor (GDI) beta                      | 0.937051038     | 9.86E-06       |
| 206978_at   | 729230 | CCR2     | chemokine (C-C motif) receptor 2                                 | 0.606782517  | 0.03428169  | 1.062945955      | 0.006838457     | 1421186_at   | 12772  | Ccr2          | chemokine (C-C motif) receptor 2                                | 1.410830301     | 0.000119611    |
| 210176_at   | 7096   | TLR1     | tolllike receptor 1                                              | 0.456610967  | 0.001267345 | 1.556174456      | 1.45E-06        | 1449049_at   | 21897  | Tlr1          | tolllike receptor 1                                             | 1.083811203     | 0.000157084    |
| 217028_at   | 7852   | CXCR4    | chemokine (C-X-C motif) receptor 4                               | 1.117790331  | 0.002107233 | 2.330546537      | 9.82E-07        | 1448710_at   | 12767  | Cxcr4         | chemokine (C-X-C motif) receptor 4                              | 1.261516562     | 6.84E-05       |
| 211075_s_at | 961    | CD47     | CD47 molecule                                                    | 0.911820305  | 2.77E-05    | 0.378354097      | 0.016102393     | 1449507_s_at | 16423  | Cd47          | CD47 antigen (Rh-related antigen, integrin-associated signal tr | 0.565250355     | 0.000689511    |
| 208659_at   | 1192   | CLIC1    | chloride intracellular channel 1                                 | 0.322251903  | 0.019641127 | 0.400306103      | 0.007603799     | 1416656_at   | 114584 | Clic1         | chloride intracellular channel 1                                | 0.706649826     | 0.00096816     |
| 53720_at    | 55337  | C19orf66 | chromosome 19 open reading frame 66                              | 0.436532945  | 0.000599255 | 0.931586625      | 4.18E-06        | 1435193_at   | 319278 | A230050P20Rik | RIKEN cDNA A230050P20 gene                                      | 0.337503407     | 0.010039671    |
| 214181_x_at | 7940   | LST1     | leukocyte specific transcript 1                                  | 0.683297816  | 0.001084533 | 1.431512312      | 4.74E-06        | 1425548_s_at | 16988  | Lst1          | leukocyte specific transcript 1                                 | 1.120611771     | 0.000862287    |
| 203148_s_at | 9830   | TRIM14   | tripartite motif containing 14                                   | 0.798671558  | 3.45E-05    | 1.548394824      | 6.78E-11        | 1436199_at   | 74735  | Trim14        | tripartite motif-containing 14                                  | 0.605847916     | 0.000418369    |
| 217764_s_at | 11031  | RAB31    | RAB31, member RAS oncogene family                                | 0.708636786  | 0.003897757 | 0.481167729      | 0.002175088     | 1416165_at   | 106572 | Rab31         | RAB31, member RAS oncogene family                               | 0.781469299     | 8.89E-05       |
| 202291_s_at | 4256   | MGP      | matrix Gla protein                                               | 0.699242486  | 0.005497165 | 0.568213128      | 0.001858371     | 1448416_at   | 17313  | Mgp           | matrix Gla protein                                              | 1.272836621     | 0.000155705    |
| 215076_s_at | 1281   | COL3A1   | collagen, type III, alpha 1                                      | 2.230793274  | 7.01E-06    | 1.469854282      | 1.74E-06        | 1421855_at   | 12825  | Col3a1        | collagen, type III, alpha 1                                     | 1.08991293      | 0.014079288    |
| 213294_at   | 5610   | EIF2AK2  | eukaryotic translation initiation factor 2-alpha kinase 2        | 1.592420737  | 2.26E-08    | 1.532529865      | 5.75E-10        | 1440866_at   | 19106  | Eif2ak2       | eukaryotic translation initiation factor 2-alpha kinase 2       | 0.636423581     | 0.002016212    |
| 201721_s_at | 7805   | LAPTM5   | lysosomal protein transmembrane 5                                | 1.29871915   | 0.000127775 | 1.631068591      | 0.002337443     | 1436905_s_at | 16792  | Laptm5        | lysosomal-associated protein transmembrane 5                    | 2.413377236     | 2.56E-06       |
| 204118_at   | 962    | CD48     | CD48 molecule                                                    | 0.516892568  | 0.035251695 | 1.52423906       | 2.89E-07        | 1427301_at   | 12506  | CD48          | CD48 antigen                                                    | 1.994478341     | 3.69E-05       |
| 204834_at   | 10075  | FGL2     | fibrinogen-like 2                                                | 1.175047375  | 1.95E-06    | 1.554486369      | 2.19E-10        | 1421855_at   | 14190  | Gf2           | fibrinogen-like protein 2                                       | 1.659076566     | 0.000616557    |
| 204232_at   | 2207   | FCER1G   | Fc fragment of IgE, high affinity I, receptor for; gamma polypep | 0.75603577   | 0.001195732 | 2.298638847      | 1.01E-08        | 1418340_at   | 14127  | Fcer1g        | Fc receptor, IgE, high affinity I, gamma polypeptide            | 1.571610716     | 6.49E-06       |
| 203636_at   | 4281   | MID1     | midline 1 (Opitz/BBB syndrome)                                   | 0.620151329  | 1.95E-05    | 0.696708366      | 8.46E-05        | 1438239_at   | 17318  | Mid1          | midline 1                                                       | 0.40642414      | 0.006030025    |
| 204774_at   | 2123   | EV12A    | ecotropic viral integration site 2A                              | 0.707506428  | 0.006431786 | 1.750800013      | 1.27E-05        | 1450241_s_at | 14017  | Ev12a         | ecotropic viral integration site 2a                             | 1.604465776     | 8.86E-05       |
| 209949_at   | 4688   | NCF2     | neutrophil cytosolic factor 2                                    | 0.402907894  | 0.019341233 | 2.074410804      | 8.13E-06        | 1448561_at   | 17970  | Ncf2          | neutrophil cytosolic factor 2                                   | 0.599268663     | 0.001219043    |
| 205474_at   | 51379  | CRLF3    | cytokine receptor-like factor 3                                  | 0.45242202   | 0.000420101 | 0.736276499      | 0.000116239     |              |        |               |                                                                 |                 |                |

|             |                |                                                                     |             |             |             |                          |                    |                                                                                   |             |             |
|-------------|----------------|---------------------------------------------------------------------|-------------|-------------|-------------|--------------------------|--------------------|-----------------------------------------------------------------------------------|-------------|-------------|
| 210145_at   | 5321 PLA2G4A   | phospholipase A2, group IVA (cytosolic, calcium-dependent)          | 0.330494845 | 0.023568267 | 0.990073835 | 1.16E-05 1448558_a_at    | 18783 Pia2g4a      | phospholipase A2, group IVA (cytosolic, calcium-dependent)                        | 0.493991924 | 0.039001185 |
| 210139_s_at | 5376 PMP22     | peripheral myelin protein 22                                        | 0.49032495  | 0.003867465 | 0.814009068 | 0.000489124 1417133_at   | 18858 Pmp22        | peripheral myelin protein 22                                                      | 0.358859056 | 0.006231507 |
| 217967_s_at | 116496 FAM129A | family with sequence similarity 129, member A                       | 0.400536265 | 0.01139265  | 1.455991736 | 6.22E-06 1422567_at      | 63913 Fam129a      | family with sequence similarity 129, member A                                     | 0.891709174 | 0.000759377 |
| 203302_at   | 1633 DCK       | deoxycytidine kinase                                                | 0.580776328 | 0.000489593 | 0.600956026 | 0.000349568 1439012_at   | 13178 Dck          | deoxycytidine kinase                                                              | 1.975702953 | 3.20E-06    |
| 212588_at   | 5788 PTPRC     | protein tyrosine phosphatase, receptor type, C                      | 0.922236101 | 0.000742291 | 2.847385019 | 2.56E-08 1422124_a_at    | 19264 Ptpcr        | protein tyrosine phosphatase, receptor type, C                                    | 2.163952025 | 1.98E-05    |
| 209040_s_at | 5696 PSMB8     | proteasome (prosome, macropain) subunit, beta type, 8 (large)       | 1.49416935  | 8.64E-07    | 0.634003831 | 0.014963873 1422962_a_at | 16913 Psmb8        | proteasome (prosome, macropain) subunit, beta type 8 (large)                      | 1.642418923 | 6.43E-06    |
| 213000_at   | 23515 MORC3    | MORC family CW-type zinc finger 3                                   | 0.3289568   | 0.001217287 | 0.376334339 | 0.006576421 1452224_at   | 338467 Morc3       | microchiria 3                                                                     | 0.49633909  | 0.0041443   |
| 201666_at   | 7076 TIMP1     | TIMP metalloproteinase inhibitor 1                                  | 1.479077592 | 8.38E-05    | 0.69010252  | 0.000383751 1460227_at   | 21857 Timp1        | tissue inhibitor of metalloproteinase 1                                           | 1.521192356 | 0.000139494 |
| 201291_s_at | 7153 TOP2A     | topoisomerase (DNA) II alpha 170kDa                                 | 0.374159725 | 0.034523549 | 0.518378137 | 0.017365714 1454694_a_at | 21973 Top2a        | topoisomerase (DNA) II alpha                                                      | 1.366412765 | 0.000293248 |
| 217478_s_at | 3108 HLA-DMA   | major histocompatibility complex, class II, DM alpha                | 1.247654178 | 4.57E-05    | 0.841404994 | 2.32E-06 1422527_at      | 14998 H2-Dma       | histocompatibility 2, class II, locus DMA                                         | 1.302833645 | 2.39E-06    |
| 206133_at   | 54739 XAF1     | XIAP associated factor 1                                            | 1.763271242 | 2.16E-07    | 2.255568594 | 3.61E-09 1443698_at      | 327959 Xaf1        | XIAP associated factor 1                                                          | 0.876047066 | 0.001064845 |
| 204279_at   | 5698 PSMB9     | proteasome (prosome, macropain) subunit, beta type, 9 (large)       | 1.863176644 | 4.12E-07    | 1.303677722 | 4.29E-09 1450696_at      | 16912 Psmb9        | proteasome (prosome, macropain) subunit, beta type 9 (large)                      | 1.39969768  | 0.001093188 |
| 201719_s_at | 2037 EPB41L2   | erythrocyte membrane protein band 4.1-like 2                        | 0.695376153 | 5.78E-06    | 0.942824955 | 3.70E-06 1459619_at      | 13822 Epb4.1l2     | erythrocyte protein band 4.1-like 2                                               | 0.396478708 | 0.015445245 |
| 204222_s_at | 11010 GLIPI1   | GLI pathogenesis-related 1                                          | 0.682598642 | 0.007543404 | 2.140742954 | 4.15E-08 1424927_at      | 73690 Glipl1       | GLI pathogenesis-related 1 (glioma)                                               | 1.296089444 | 0.000206054 |
| 209969_s_at | 6772 STAT1     | signal transducer and activator of transcription 1, 91kDa           | 1.881759847 | 6.27E-07    | 1.490140271 | 2.59E-07 1450033_a_at    | 20846 Stat1        | signal transducer and activator of transcription 1                                | 0.734715773 | 0.033938684 |
| 202953_at   | 713 C1QB       | complement component 1, q subcomponent, B chain                     | 1.517738935 | 0.000358495 | 2.863414132 | 3.71E-07 1437726_v_at    | 12260 C1qb         | complement component 1, q subcomponent, beta polypeptide                          | 2.767560245 | 4.56E-07    |
| 201858_s_at | 5552 SRGN      | serglycin                                                           | 0.891442649 | 0.015054552 | 1.537047343 | 3.74E-05 1417426_at      | 19073 Srgn         | serglycin                                                                         | 0.710252823 | 6.41E-05    |
| 206436_s_at | 3665 IRF7      | interferon regulatory factor 7                                      | 0.810793973 | 0.00017767  | 1.649864363 | 1.05E-05 1417244_a_at    | 54123 Irf7         | interferon regulatory factor 7                                                    | 1.388367772 | 0.00021114  |
| 219777_at   | 474344 GIMAP6  | GTPase, IMAP family member 6                                        | 1.477540986 | 1.46E-09    | 1.100621715 | 2.40E-06 1456762_at      | 231931 Gimap6      | GTPase, IMAP family member 6                                                      | 0.326573137 | 0.01445271  |
| 219014_at   | 51316 PLAC8    | placenta-specific 8                                                 | 0.69095793  | 0.025934851 | 1.803302477 | 3.68E-06 1451335_at      | 215207 Plac8       | placenta-specific 8                                                               | 1.759720769 | 3.86E-06    |
| 203698_s_at | 2487 FRZB      | frizzled-related protein                                            | 0.779534903 | 0.001176966 | 2.312548092 | 1.42E-09 1448424_at      | 20378 Frzb         | frizzled-related protein                                                          | 0.563873699 | 0.013216237 |
| 210785_s_at | 9473 C1orf38   | chromosome 1 open reading frame 38                                  | 0.322287437 | 0.046572006 | 1.331468336 | 2.92E-06 1427041_at      | 230787 BC013712    | cDNA sequence BC013712                                                            | 0.101400575 | 0.000698813 |
| 204655_at   | 6352 CCL5      | chemokine (C-C motif) ligand 5                                      | 0.859966883 | 0.002630046 | 1.149969123 | 0.000876481 1418126_at   | 20304 Ccl5         | chemokine (C-C motif) ligand 5                                                    | 1.502118437 | 0.001219386 |
| 204680_at   | 3669 ISG20     | interferon stimulated exonuclease gene 20kDa                        | 0.902965859 | 0.002112383 | 2.688146326 | 3.77E-12 1419569_a_at    | 57444 Isg20        | interferon-stimulated protein                                                     | 1.339470017 | 9.41E-07    |
| 200891_s_at | 81552 VOPP1    | vesicular, overexpressed in cancer, prosurvival protein 1           | 0.530566112 | 0.001059741 | 0.580107953 | 7.88E-06 1451127_at      | 23223 Vopp1        | vesicular, overexpressed in cancer, prosurvival protein 1                         | 0.501047737 | 0.02509899  |
| 21232_s_at  | 712 C1QA       | complement component 1, q subcomponent, A chain                     | 1.98519346  | 1.97E-06    | 3.463347244 | 7.94E-10 1417381_at      | 12259 C1qa         | complement component 1, q subcomponent, alpha polypeptide                         | 2.152459414 | 5.09E-08    |
| 218543_s_at | 64761 PARP12   | poly (ADP-ribose) polymerase family, member 12                      | 1.397360297 | 3.66E-07    | 1.539245852 | 1.21E-10 1426774_at      | 243771 Parp12      | poly (ADP-ribose) polymerase family, member 12                                    | 0.677666643 | 0.000282666 |
| 203882_at   | 10379 IRF9     | interferon regulatory factor 9                                      | 1.487425203 | 1.22E-08    | 0.644774481 | 0.003462172 1421322_at   | 16391 Irf9         | interferon regulatory factor 9                                                    | 1.194871743 | 9.86E-06    |
| 213539_at   | 915 CD3D       | CD3d molecule, delta (CD3-TCR complex)                              | 0.359834468 | 0.027493887 | 0.677364972 | 0.041151559 1422828_at   | 12500 Cd3d         | CD3 antigen, delta polypeptide                                                    | 0.817531066 | 0.002199689 |
| 211964_at   | 1284 COL4A2    | collagen, type IV, alpha 2                                          | 0.914055504 | 0.000318131 | 1.382588708 | 4.93E-07 1424051_at      | 12827 Col4a2       | collagen, type IV, alpha 2                                                        | 0.510641469 | 0.017468919 |
| 209619_at   | 972 CD74       | CD74 molecule, major histocompatibility complex, class II invariant | 0.692465079 | 0.003028754 | 0.553425136 | 0.016348438 1425519_a_at | 16149 Cd74         | CD74 antigen (invariant polypeptide of major histocompatibility complex class II) | 1.415695889 | 1.98E-05    |
| 202664_at   | 7456 WIPF1     | WAS/WASL interacting protein family, member 1                       | 0.499629353 | 0.00041127  | 0.870166708 | 0.00162308 1436953_at    | 215280 Wipf1       | WAS/WASL interacting protein family, member 1                                     | 0.622530402 | 0.000393868 |
| 221269_s_at | 83442 SH3BGR1  | SH3 domain binding glutamic acid-rich protein like 3                | 0.484761176 | 0.000904203 | 0.780722401 | 4.04E-05 1416528_at      | 73723 Sh3bgr1      | SH3 domain binding glutamic acid-rich protein-like 3                              | 1.068511863 | 5.82E-05    |
| 204057_at   | 3394 IRF8      | interferon regulatory factor 8                                      | 0.554766211 | 0.016538816 | 1.201572679 | 0.001527444 1416714_at   | 15900 Irf8         | interferon regulatory factor 8                                                    | 0.54551655  | 0.006998912 |
| 205859_at   | 9450 LY86      | lymphocyte antigen 86                                               | 0.497939725 | 0.001119029 | 1.72679504  | 1.06E-08 1422903_at      | 17084 Ly86         | lymphocyte antigen 86                                                             | 1.503333696 | 4.25E-06    |
| 200986_at   | 710 SERPING1   | serpin peptidase inhibitor, clade G (C1 inhibitor), member 1        | 1.323212664 | 5.90E-07    | 0.517304078 | 0.012541296 1416625_at   | 12258 Serping1     | serine (or cysteine) peptidase inhibitor, clade G, member 1                       | 0.861906067 | 3.12E-05    |
| 213923_at   | 5912 RAP2B     | RAP2B, member of RAS oncogene family                                | 0.364919789 | 0.031811625 | 0.781032915 | 2.40E-06 1448885_at      | 74012 Rap2b        | RAP2B, member of RAS oncogene family                                              | 0.678557726 | 3.83E-05    |
| 207540_s_at | 6850 SYK       | spleen tyrosine kinase                                              | 0.453695303 | 0.000533543 | 0.850340227 | 0.00015332 1418262_at    | 20963 Syk          | spleen tyrosine kinase                                                            | 0.85275255  | 0.000157241 |
| 202902_s_at | 1520 CTSS      | cathepsin 5                                                         | 1.466180635 | 4.21E-05    | 2.364599101 | 3.31E-09 1448591_at      | 13040 Ctss         | cathepsin 5                                                                       | 2.38627119  | 1.64E-07    |
| 206420_at   | 10261 IGSF6    | immunoglobulin superfamily, member 6                                | 0.499694485 | 0.003028754 | 1.695406664 | 4.30E-06 1421408_at      | 80719 Igcf6        | immunoglobulin superfamily, member 6                                              | 0.974227271 | 9.68E-05    |
| 216231_s_at | 567 B2M        | beta-2-microglobulin                                                | 0.80462432  | 3.18E-10    | 0.373979101 | 0.00027779 1427511_at    | 12010 B2m          | beta-2 microglobulin                                                              | 0.992948791 | 7.14E-06    |
| 201649_at   | 9246 UBE2L6    | ubiquitin-conjugating enzyme E2L 6                                  | 1.347128919 | 1.16E-07    | 1.012785209 | 1.33E-06 1417172_at      | 56791 Ube2l6       | ubiquitin-conjugating enzyme E2L 6                                                | 0.539398556 | 0.002002746 |
| 204122_at   | 7305 TYROBP    | TYRO protein tyrosine kinase binding protein                        | 1.760548711 | 2.81E-06    | 3.311993782 | 1.30E-10 1450792_at      | 22177 Tyrobp       | TYRO protein tyrosine kinase binding protein                                      | 1.940264768 | 7.71E-07    |
| 201762_s_at | 5721 PSME2     | proteasome (prosome, macropain) activator subunit 2 (PA28 b)        | 0.712502175 | 2.00E-05    | 0.959082889 | 1.95E-06 1417189_at      | 19188 Psme2        | proteasome (prosome, macropain) 28 subunit, beta                                  | 0.541229003 | 0.001065983 |
| 200923_at   | 3959 LGALS3BP  | lectin, galactoside-binding, soluble, 3 binding protein             | 1.118501611 | 1.36E-07    | 0.506310531 | 0.015133314 1448380_at   | 19039 Lgals3bp     | lectin, galactoside-binding, soluble, 3 binding protein                           | 1.122377013 | 0.000456393 |
| 201890_at   | 6241 RRM2      | ribonucleotide reductase M2                                         | 0.53774377  | 0.013605658 | 0.962151213 | 0.003682954 1448226_at   | 20135 Rrm2         | ribonucleotide reductase M2                                                       | 1.022759467 | 0.00017602  |
| 218870_at   | 55843 ARHGAP15 | Rho GTPase activating protein 15                                    | 0.675873569 | 0.001400359 | 0.944556054 | 0.00027779 1435959_at    | 76117 Arhgap15     | Rho GTPase activating protein 15                                                  | 0.955301562 | 0.00105555  |
| 218252_at   | 26586 CKAP2    | cytoskeleton associated protein 2                                   | 0.442496241 | 0.000390965 | 0.453728616 | 0.030784304 1434748_at   | 80986 Ckap2        | cytoskeleton associated protein 2                                                 | 0.369024741 | 0.001980005 |
| 212063_at   | 960 CD44       | CD44 molecule (Indian blood group)                                  | 1.047131566 | 0.00046457  | 2.386358806 | 1.31E-07 1423760_at      | 12505 Cd44         | CD44 antigen                                                                      | 2.266756    | 8.46E-06    |
| 213566_at   | 6039 RNASE6    | ribonuclease, RNase A family, k6                                    | 1.199112022 | 0.000665027 | 1.95898513  | 8.91E-07 1430534_at      | 78416 Rnase6       | ribonuclease, RNase A family, 6                                                   | 0.363641662 | 0.046740859 |
| 202766_s_at | 2200 FBN1      | fibrillin 1                                                         | 0.558237772 | 0.000491148 | 0.908637482 | 0.00018751 1460208_at    | 14118 Fbn1         | fibrillin 1                                                                       | 0.764274196 | 0.001430624 |
| 219506_at   | 79630 C1orf54  | chromosome 1 open reading frame 54                                  | 0.441444842 | 0.00110653  | 0.762832421 | 2.05E-06 1427996_at      | 229600 BC028528    | cDNA sequence BC028528                                                            | 0.455115387 | 0.000406547 |
| 213051_at   | 56829 ZC3HAV1  | zinc finger CCHC-type, antiviral 1                                  | 0.416568993 | 0.000183371 | 0.526789427 | 0.010788129 1436183_at   | 78781 Zc3hav1      | zinc finger CCHC type, antiviral 1                                                | 0.701075492 | 9.41E-05    |
| 218668_s_at | 57826 RAP2C    | RAP2C, member of RAS oncogene family                                | 0.365874982 | 0.002663362 | 0.827947476 | 1.62E-06 1460430_at      | 72065 Rap2c        | RAP2C, member of RAS oncogene family                                              | 0.407671234 | 0.007956731 |
| 201743_at   | 929 CD14       | CD14 molecule                                                       | 0.671354563 | 0.01222513  | 2.191312746 | 2.97E-09 1417268_at      | 12475 Cd14         | CD14 antigen                                                                      | 2.220311198 | 5.29E-05    |
| 206134_at   | 27299 ADAMDEC1 | ADAM-like, decysin 1                                                | 0.497946163 | 0.011456903 | 0.613811162 | 0.031276097 1419476_at   | 58860 Adamdec1     | ADAM-like, decysin 1                                                              | 0.436604284 | 0.022255329 |
| 203104_at   | 1436 CSF1R     | colony stimulating factor 1 receptor                                | 0.536225066 | 0.000545332 | 1.322690943 | 1.97E-06 1419872_at      | 12978 Csf1r        | colony stimulating factor 1 receptor                                              | 0.392888161 | 0.00612817  |
| 211980_at   | 1282 COL4A1    | collagen, type IV, alpha 1                                          | 0.978832428 | 0.000152016 | 1.241015069 | 4.53E-06 1452035_at      | 12826 Col4a1       | collagen, type IV, alpha 1                                                        | 0.560952088 | 0.001770779 |
| 20186_s_at  | 103 ADAR       | adenosine deaminase, RNA-specific                                   | 0.755641627 | 1.16E-07    | 0.83954602  | 2.46E-06 1439276_at      | 56417 Adar         | adenosine deaminase, RNA-specific                                                 | 0.708359518 | 0.001988226 |
| 200814_at   | 5720 PSME1     | proteasome (prosome, macropain) activator subunit 1 (PA28 a)        | 0.384839423 | 6.16E-05    | 0.536241532 | 1.11E-08 1417056_at      | 19186 Psme1        | proteasome (prosome, macropain) 28 subunit, alpha                                 | 0.451145517 | 0.004547886 |
| 213137_s_at | 5771 PTPN2     | protein tyrosine phosphatase, non-receptor type 2                   | 0.432748184 | 3.00E-05    | 0.4409186   | 0.004192744 1417140_a_at | 19255 Ptpn2        | protein tyrosine phosphatase, non-receptor type 2                                 | 0.416728006 | 0.012653873 |
| 211795_s_at | 2533 FYB       | FYB binding protein                                                 | 0.524574886 | 9.23E-06    | 0.948108847 | 0.000100968 1452117_a_at | 23880 Fyb          | FYB binding protein                                                               | 1.671634799 | 2.17E-05    |
| 221875_v_at | 3134 HLA-F     | major histocompatibility complex, class I, F                        | 1.15845164  | 2.78E-08    | 0.499117218 | 0.000874811 1421358_at   | 14991 H2-M3        | histocompatibility 2, M region locus 3                                            | 0.672888837 | 0.000511795 |
| 210982_s_at | 3122 HLA-DRA   | major histocompatibility complex, class II, DR alpha                | 1.032229097 | 0.000131706 | 0.882447491 | 0.000144095 1422892_s_at | 100504404 H2-Ea-ps | histocompatibility 2, class II antigen E alpha, pseudogene                        | 1.451855196 | 4.50E-05    |
